# Supplementary material for: Ferric chloride-catalyzed C–N bond cleavage for the cyclization of arylallenes leading to polysubstituted indenes
Source: Royal Society of Chemistry journal article supplement (doi:10.1039/c2cc36048a), 2012-01-01
Supplement: c2cc36048a.pdf [file c2cc36048a.pdf]

## Ferric chloride-catalyzed C–N bond cleavage for the cyclization of arylallenes leading to polysubstituted indenenes

Cong-Rong Liu,<sup>ab</sup> Ting-Ting Wang,<sup>a</sup> Qing-Biao Qi<sup>a</sup> and Shi-Kai Tian<sup>\*ac</sup>

<sup>a</sup> Joint Laboratory of Green Synthetic Chemistry, Department of Chemistry, University of Science and Technology of China, Hefei, Anhui 230026, China

<sup>b</sup> Department of Environmental Engineering, Nanjing Institute of Technology, Nanjing, Jiangsu 211167, China

<sup>c</sup> Key Laboratory of Synthetic Chemistry of Natural Substance, Shanghai Institute of Organic Chemistry, Chinese Academy of Sciences, Shanghai 20032, China

### Supporting information

#### Table of contents

|                                                                                                                         |      |
|-------------------------------------------------------------------------------------------------------------------------|------|
| General information.....                                                                                                | S-2  |
| Preparation of allene <b>1a</b> .....                                                                                   | S-2  |
| Preparation of allenes <b>1g-i</b> .....                                                                                | S-2  |
| General procedure for the synthesis of polysubstituted indenenes from arylallenes and <i>N</i> -alkyl sulfonamides..... | S-3  |
| Analytical data for the products.....                                                                                   | S-4  |
| References.....                                                                                                         | S-11 |
| Copies of <sup>1</sup> H and <sup>13</sup> C NMR spectra.....                                                           | S-12 |
| Crystal data.....                                                                                                       | S-29 |

### General information

$^1\text{H}$  and  $^{13}\text{C}$  NMR Spectra were recorded on a Bruker AC-400 FT spectrometer (400 MHz and 100 MHz, respectively) using tetramethylsilane as internal reference. Chemical shifts ( $\delta$ ) and coupling constants ( $J$ ) were expressed in ppm and Hz, respectively. IR spectra were recorded on a Perkin-Elmer 2000 FTIR spectrometer. High resolution mass spectra were recorded on a LC-TOF spectrometer (Micromass). Melting points were uncorrected.

Sulfonamides **2a-l**, benzhydrylamine derivatives **2ab-ae**,<sup>1</sup> and allenes **1b-e**<sup>2</sup> and **1f**<sup>3</sup> were prepared according to literature procedures. The rest of chemicals were purchased from the Sinopharm Chemical Reagent Co., Meryer, Acros, and Alfa Aesar, and used as received. Solvents were dried over magnesium sulfate before use.

### Preparation of allene **1a**<sup>2</sup>

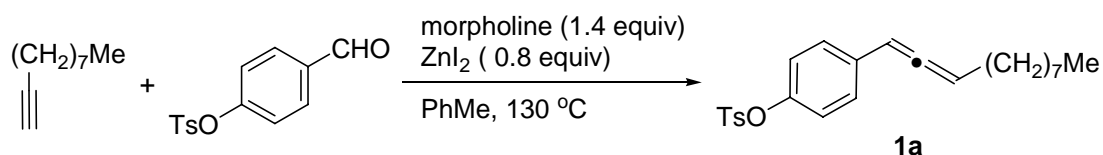

Under a nitrogen atmosphere, morpholine (122 mg, 1.4 mmol) was added to a mixture of 1-decyne (138 mg, 1.0 mmol), 4-formylphenyl 4-methylbenzenesulfonate (497 mg, 1.8 mmol), and  $\text{ZnI}_2$  (255 mg, 0.80 mmol) in toluene (5.0 mL). The mixture was stirred at  $130\text{ }^\circ\text{C}$  for 10 h, and cooled to room temperature. The mixture was purified by silica gel column chromatography, eluting with petroleum ether/ethyl acetate (20:1), to give allene **1a** (203 mg, 51%) as a colorless oil.  $^1\text{H}$  NMR (400 MHz,  $\text{CDCl}_3$ )  $\delta$  7.70 (d,  $J = 8.4$  Hz, 2H), 7.30 (d,  $J = 8.4$  Hz, 2H), 7.17 (d,  $J = 8.8$  Hz, 2H), 6.89 (d,  $J = 8.8$  Hz, 2H), 6.07-6.03 (m, 1H), 5.58-5.53 (m, 1H), 2.44 (s, 3H), 2.14-2.07 (m, 2H), 1.46-1.40 (m, 2H), 1.38-1.25 (m, 10H), 0.87 (t,  $J = 7.2$  Hz, 3H);  $^{13}\text{C}$  NMR (100 MHz,  $\text{CDCl}_3$ )  $\delta$  204.4, 147.1, 144.2, 133.3, 131.5, 128.7, 127.5, 126.5, 121.5, 94.5, 92.5, 30.8, 28.1, 27.6, 21.6, 20.7, 13.1; IR (film)  $\nu$  3066, 2927, 1709, 1597, 1500, 1462  $\text{cm}^{-1}$ ; HRMS (EI) calcd for  $\text{C}_{24}\text{H}_{30}\text{O}_3\text{S}$  (M) 398.1916, found 398.1922.

### Preparation of allenes **1g-i**<sup>3</sup>

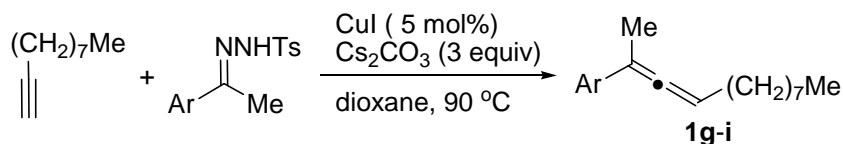

Under a nitrogen atmosphere, 1-decyne (276 mg, 2.0 mmol) was added to a mixture of  $\text{CuI}$  (19.0 mg, 0.10 mmol),  $\text{Cs}_2\text{CO}_3$  (1.96 g, 6.0 mmol), and the corresponding *N*-alkylidene-*p*-tosylhydrazine (2.6 mmol) in dioxane (20 mL). The mixture was stirred at  $90\text{ }^\circ\text{C}$  until no further transformation was detected by TLC analysis. The solvent was then removed in vacuo to provide a crude mixture, which was purified by column chromatography on silica gel to give the corresponding

allene.

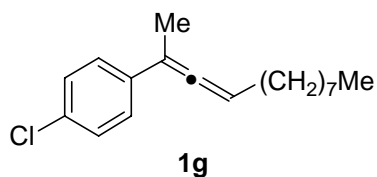

Allene **1g** was obtained in 17% yield as a colorless oil.  $^1\text{H}$  NMR (400 MHz,  $\text{CDCl}_3$ )  $\delta$  7.31 (d,  $J = 8.8$  Hz, 2H), 7.26 (d,  $J = 8.8$  Hz, 2H), 5.46-5.42 (m, 1H), 2.13-2.06 (m, 2H), 2.06 (s, 3H), 1.48-1.41 (m, 2H), 1.39-1.25 (m, 10H), 0.87 (t,  $J = 7.2$  Hz, 3H);  $^{13}\text{C}$  NMR (100 MHz,  $\text{CDCl}_3$ )  $\delta$  204.2, 136.4, 131.9, 128.3, 126.8, 99.5, 93.5, 31.9, 29.4, 29.3, 29.2, 28.9, 22.7, 19.2, 17.1, 14.1; IR (film)  $\nu$  3068, 3032, 2927, 1708, 1599, 1500, 1462  $\text{cm}^{-1}$ ; HRMS (EI) calcd for  $\text{C}_{18}\text{H}_{25}\text{Cl}$  (M) 276.1645, found 276.1653.

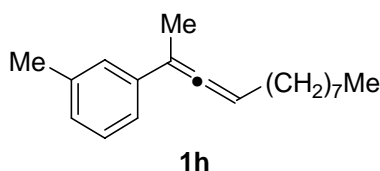

Allene **1h** was obtained in 19% yield as a colorless oil.  $^1\text{H}$  NMR (400 MHz,  $\text{CDCl}_3$ )  $\delta$  7.21-7.17 (m, 3H), 7.00 (s, 1H), 5.44-5.39 (m, 1H), 2.34 (s, 3H), 2.26-2.22 (m, 1H), 2.13-2.07 (m, 1H), 2.07 (s, 3H), 1.52-1.26 (m, 12H), 0.87 (t,  $J = 7.2$  Hz, 3H);  $^{13}\text{C}$  NMR (100 MHz,  $\text{CDCl}_3$ )  $\delta$  204.1, 137.7, 131.3, 128.1, 127.1, 126.3, 122.7, 100.3, 92.9, 31.8, 29.2, 28.9, 28.4, 22.7, 21.5, 19.2, 17.2, 14.1; IR (film)  $\nu$  3023, 2925, 1712, 1607, 1487, 1463  $\text{cm}^{-1}$ ; HRMS (EI) calcd for  $\text{C}_{19}\text{H}_{28}$  (M) 256.2191, found 256.2192.

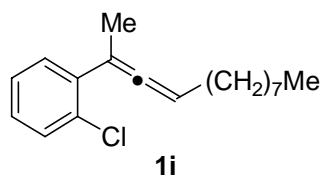

Allene **1i** was obtained in 14% yield as a colorless oil.  $^1\text{H}$  NMR (400 MHz,  $\text{CDCl}_3$ )  $\delta$  7.37-7.34 (m, 1H), 7.30-7.27 (m, 1H), 7.21-7.12 (m, 2H), 5.24-5.18 (m, 1H), 2.31-2.29 (m, 1H), 2.09-2.02 (m, 4H), 1.45-1.36 (m, 2H), 1.32-1.25 (m, 10H), 0.88 (t,  $J = 7.2$  Hz, 3H);  $^{13}\text{C}$  NMR (100 MHz,  $\text{CDCl}_3$ )  $\delta$  203.9, 138.4, 130.0, 127.8, 126.6, 124.6, 121.7, 98.7, 91.3, 31.9, 29.7, 29.4, 29.3, 29.1, 28.7, 22.7, 20.2, 14.1; IR (film)  $\nu$  3063, 2924, 1730, 1594, 1463, 1435  $\text{cm}^{-1}$ ; HRMS (EI) calcd for  $\text{C}_{18}\text{H}_{25}\text{Cl}$  (M) 276.1645, found 276.1648.

**General procedure for the synthesis of polysubstituted indenenes from arylallenes and *N*-alkyl sulfonamides**

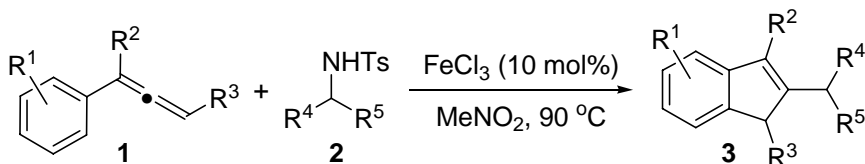

To a solution of *N*-alkyl sulfonamide **2** (0.20 mmol) in dry nitromethane (2.0 mL) under nitrogen were added arylallene **1** (0.30 mmol) and  $\text{FeCl}_3$  (3.3 mg, 0.020 mmol). The resulting mixture was stirred at  $90\text{ }^\circ\text{C}$  until no further transformation was detected by TLC analysis. The mixture was cooled to room temperature, and purified by silica gel column chromatography, eluting with petroleum ether/ethyl acetate (50:1 to 10:1), to give indene **3**.

### Analytical data for the products

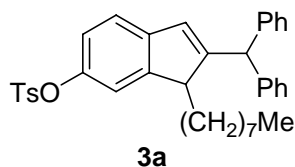

Indene **3a**, colorless oil;  $^1\text{H}$  NMR (400 MHz,  $\text{CDCl}_3$ )  $\delta$  7.69 (d,  $J = 8.4$  Hz, 2H), 7.34-7.18 (m, 10H), 7.15 (d,  $J = 8.4$  Hz, 2H), 7.02 (d,  $J = 8.0$  Hz, 1H), 6.94-6.92 (m, 1H), 6.79-6.75 (m, 1H), 6.09 (s, 1H), 5.01 (s, 1H), 3.37-3.34 (m, 1H), 2.42 (s, 3H), 1.80-1.68 (m, 2H), 1.30-1.17 (m, 12H), 0.88 (t,  $J = 7.2$  Hz, 3H);  $^{13}\text{C}$  NMR (100 MHz,  $\text{CDCl}_3$ )  $\delta$  157.3, 149.0, 147.0, 145.0, 143.0, 142.6, 142.3, 132.7, 128.6, 126.5, 120.7, 120.5, 117.4, 51.9, 50.4, 31.9, 29.9, 29.7, 29.4, 29.3, 24.0, 22.7, 21.7, 14.1; IR (film)  $\nu$  3062, 3027, 2927, 1598, 1494, 1466  $\text{cm}^{-1}$ ; HRMS (EI) calcd for  $\text{C}_{37}\text{H}_{40}\text{O}_3\text{S}$  (M) 564.2698, found 564.2695.

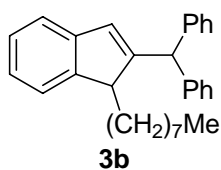

Indene **3b**, colorless oil;  $^1\text{H}$  NMR (400 MHz,  $\text{CDCl}_3$ )  $\delta$  7.33-7.09 (m, 14H), 6.16 (s, 1H), 5.06 (s, 1H), 3.43-3.39 (m, 1H), 1.97-1.85 (m, 1H), 1.82-1.73 (m, 1H), 1.28-1.19 (m, 12H), 0.87 (t,  $J = 6.8$  Hz, 3H);  $^{13}\text{C}$  NMR (100 MHz,  $\text{CDCl}_3$ )  $\delta$  155.8, 147.6, 144.1, 142.7, 130.0, 129.2, 129.0, 128.5, 128.3, 126.6, 126.4, 124.2, 122.8, 120.5, 51.9, 50.2, 31.8, 30.0, 29.7, 29.4, 29.3, 24.1, 22.7, 14.1; IR (film)  $\nu$  3062, 3025, 2926, 1601, 1492, 1458  $\text{cm}^{-1}$ ; HRMS (EI) calcd for  $\text{C}_{30}\text{H}_{34}$  (M) 394.2661, found 394.2662.

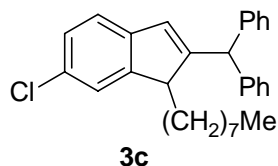

Indene **3c**, white solid, m.p. 118-120 °C;  $^1\text{H}$  NMR (400 MHz,  $\text{CDCl}_3$ )  $\delta$  7.34-7.24 (m, 9H), 7.17-7.15 (m, 3H), 7.08 (d,  $J = 8.0$  Hz, 1H), 6.11 (s, 1H), 5.03 (s, 1H), 3.42-3.39 (m, 1H), 1.97-1.89 (m, 1H), 1.80-1.74 (m, 1H), 1.29-1.20 (m, 12H), 0.88 (t,  $J = 7.2$  Hz, 3H);  $^{13}\text{C}$  NMR (100 MHz,  $\text{CDCl}_3$ )  $\delta$  156.4, 149.4, 142.7, 142.6, 142.4, 129.1, 128.6, 126.8, 126.5, 123.3, 121.2, 51.9, 50.4, 31.8, 29.9, 29.5, 29.4, 29.3, 24.0, 22.7, 14.1; IR (film)  $\nu$  3062, 3026, 2956, 2926, 1598, 1561, 1493, 1462  $\text{cm}^{-1}$ ; HRMS (EI) calcd for  $\text{C}_{30}\text{H}_{33}\text{Cl}$  (M) 428.2271, found 428.2279.

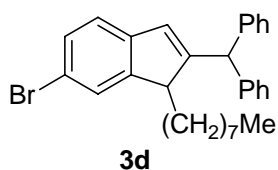

Indene **3d**, colorless oil;  $^1\text{H}$  NMR (400 MHz,  $\text{CDCl}_3$ )  $\delta$  7.41 (s, 1H), 7.32-7.23 (m, 5H), 7.23-7.20 (m, 4H), 7.17-7.14 (m, 2H), 7.02 (d,  $J = 8.0$  Hz, 1H), 6.10 (s, 1H), 5.02 (s, 1H), 3.41-3.38 (m, 1H), 1.92-1.81 (m, 1H), 1.79-1.73 (m, 1H), 1.28-1.15 (m, 12H), 0.88 (t,  $J = 7.2$  Hz, 3H);  $^{13}\text{C}$  NMR (100 MHz,  $\text{CDCl}_3$ )  $\delta$  156.4, 149.7, 143.0, 142.7, 142.3, 129.4, 129.1, 128.6, 126.7, 126.1, 121.7, 118.3, 51.9, 50.4, 31.8, 29.9, 29.5, 29.3, 29.2, 24.0, 22.7, 14.1; IR (film)  $\nu$  3060, 3025, 2925, 1600, 1492, 1451  $\text{cm}^{-1}$ ; HRMS (EI) calcd for  $\text{C}_{30}\text{H}_{33}\text{Br}$  (M) 472.1766, found 472.1773.

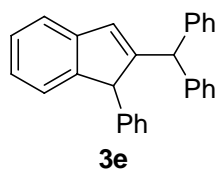

Indene **3e**, white solid, m.p. 96-98 °C;  $^1\text{H}$  NMR (400 MHz,  $\text{CDCl}_3$ )  $\delta$  7.34-7.15 (m, 13H), 7.12-7.01 (m, 4H), 7.00-6.88 (m, 2H), 6.27 (s, 1H), 4.73 (s, 1H), 4.38 (s, 1H);  $^{13}\text{C}$  NMR (100 MHz,  $\text{CDCl}_3$ )  $\delta$  157.1, 148.9, 144.0, 143.0, 142.2, 139.6, 129.8, 129.3, 128.8, 128.6, 128.2, 126.9, 126.7, 126.3, 124.9, 124.0, 120.6, 57.7, 51.5; IR (film)  $\nu$  3029, 2927, 1599, 1502, 1459  $\text{cm}^{-1}$ ; HRMS (EI) calcd for  $\text{C}_{28}\text{H}_{22}$  (M) 358.1722, found 358.1721.

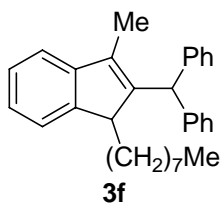

Indene **3f**, colorless oil;  $^1\text{H}$  NMR (400 MHz,  $\text{CDCl}_3$ )  $\delta$  7.34-7.13 (m, 14H), 5.35

(s, 1H), 3.40-3.35 (m, 1H) 1.99-1.87 (m, 1H), 1.65 (s, 3H), 1.62-1.40 (m, 1H), 1.19-1.03 (m, 12H), 0.86 (t,  $J = 7.2$  Hz, 3H);  $^{13}\text{C}$  NMR (100 MHz,  $\text{CDCl}_3$ )  $\delta$  146.9, 146.8, 146.4, 143.3, 142.9, 134.9, 129.2, 128.4, 128.2, 126.4, 126.2, 124.3, 122.5, 118.3, 51.8, 50.7, 31.8, 30.2, 29.7, 29.4, 25.0, 22.7, 14.1, 11.4; IR (film)  $\nu$  3062, 3026, 2926, 1601, 1493, 1467  $\text{cm}^{-1}$ ; HRMS (EI) calcd for  $\text{C}_{31}\text{H}_{36}$  (M) 408.2817, found 408.2825.

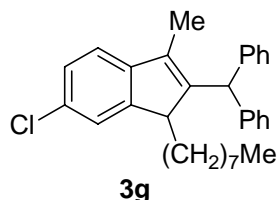

Indene **3g**, colorless oil;  $^1\text{H}$  NMR (400 MHz,  $\text{CDCl}_3$ )  $\delta$  7.31-7.10 (m, 13H), 5.32 (s, 1H), 3.40-3.33 (m, 1H), 1.94-1.86 (m, 1H), 1.63 (s, 3H), 1.61-1.56 (m, 1H), 1.22-1.02 (m, 12H), 0.87 (t,  $J = 7.2$  Hz, 3H);  $^{13}\text{C}$  NMR (100 MHz,  $\text{CDCl}_3$ )  $\delta$  148.5, 146.8, 145.4, 142.9, 142.6, 134.4, 130.4, 129.2, 128.5, 128.3, 126.5, 126.3, 122.9, 119.1, 51.8, 50.7, 31.8, 30.0, 29.8, 29.3, 24.8, 22.7, 14.1, 11.4; IR (film)  $\nu$  3064, 3027, 2927, 1649, 1597, 1490, 1465  $\text{cm}^{-1}$ ; HRMS (EI) calcd for  $\text{C}_{31}\text{H}_{35}\text{Cl}$  (M) 442.2427, found 442.2420.

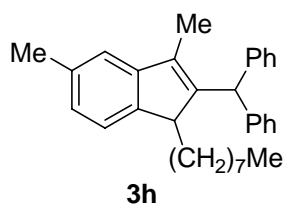

Indene **3h**, colorless oil;  $^1\text{H}$  NMR (400 MHz,  $\text{CDCl}_3$ )  $\delta$  7.29-7.14 (m, 11H), 7.05 (s, 1H), 6.97 (d,  $J = 8.4$  Hz, 1H), 5.34 (s, 1H), 3.38-3.30 (m, 1H), 2.39 (s, 3H), 1.96-1.85 (m, 1H), 1.64 (s, 3H), 1.51-1.45 (m, 1H), 1.26-0.95 (m, 12H), 0.86 (t,  $J = 7.2$  Hz, 3H);  $^{13}\text{C}$  NMR (100 MHz,  $\text{CDCl}_3$ )  $\delta$  147.1, 146.7, 143.9, 143.3, 142.9, 135.8, 134.7, 129.3, 128.3, 128.2, 126.3, 126.2, 125.0, 122.2, 119.1, 51.5, 50.7, 31.8, 30.3, 29.9, 29.4, 29.3, 25.1, 22.7, 21.6, 14.1, 11.4; IR (film)  $\nu$  3061, 3025, 2926, 1600, 1493, 1461, 1414  $\text{cm}^{-1}$ ; HRMS (EI) calcd for  $\text{C}_{32}\text{H}_{38}$  (M) 422.2974, found 442.2979.

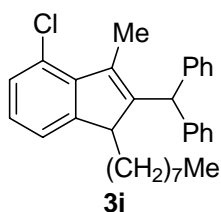

Indene **3i**, colorless oil;  $^1\text{H}$  NMR (400 MHz,  $\text{CDCl}_3$ )  $\delta$  7.31-7.16 (m, 12H), 7.05-7.01 (m, 1H), 5.38 (s, 1H), 3.44-3.34 (m, 1H), 2.06 (s, 3H), 1.90-1.80 (m, 1H), 1.28-1.21 (m, 1H), 1.16-0.96 (m, 12H), 0.86 (t,  $J = 7.2$  Hz, 3H);  $^{13}\text{C}$  NMR (100 MHz,  $\text{CDCl}_3$ )  $\delta$  150.0, 148.1, 142.9, 142.6, 142.2, 135.8, 129.2, 129.1, 128.4, 126.6, 126.4, 126.3, 125.3, 121.0, 52.0, 50.6, 31.8, 29.8, 29.3, 29.2, 24.8, 22.7, 15.3, 14.1; IR (film)

$\nu$  3060, 3026, 2926, 1600, 1564, 1493, 1451  $\text{cm}^{-1}$ ; HRMS (EI) calcd for  $\text{C}_{31}\text{H}_{35}\text{Cl}$  (M) 442.2427, found 442.2426.

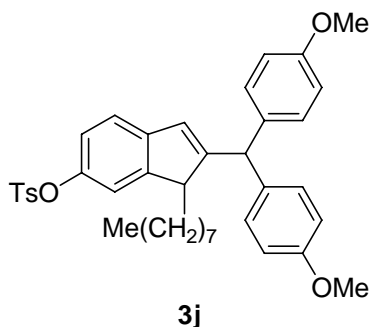

Indene **3j**, colorless oil; <sup>1</sup>H NMR (400 MHz, CDCl<sub>3</sub>)  $\delta$  7.69 (d,  $J$  = 8.0 Hz, 2H), 7.27 (d,  $J$  = 8.0 Hz, 2H), 7.11 (d,  $J$  = 8.4 Hz, 2H), 7.06-6.98 (m, 3H), 6.91 (s, 1H), 6.86-6.81 (m, 4H), 6.79-6.76 (m, 1H), 6.08 (s, 1H), 4.92 (s, 1H), 3.78 (s, 6H), 3.35-3.31 (m, 1H), 2.42 (s, 3H), 1.81-1.68 (m, 2H), 1.22-1.16 (m, 12H), 0.88 (t,  $J$  = 6.8 Hz, 3H); <sup>13</sup>C NMR (100 MHz, CDCl<sub>3</sub>)  $\delta$  158.4, 158.2, 149.0, 147.0, 145.0, 143.1, 132.7, 129.6, 128.6, 122.0, 120.5, 117.3, 114.0, 113.7, 55.2, 50.3, 50.2, 31.9, 29.9, 29.7, 29.4, 29.3, 24.0, 22.7, 21.7, 14.1; IR (film)  $\nu$  3062, 3026, 2926, 1597, 1491, 1455, 1408  $\text{cm}^{-1}$ ; HRMS (EI) calcd for  $\text{C}_{39}\text{H}_{44}\text{O}_5\text{S}$  (M) 624.2909, found 624.2911.

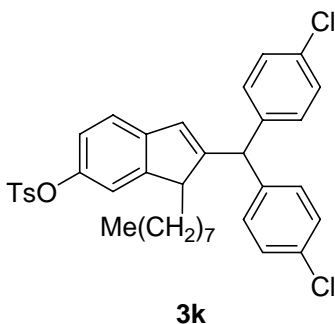

Indene **3k**, colorless oil; <sup>1</sup>H NMR (400 MHz, CDCl<sub>3</sub>)  $\delta$  7.70 (d,  $J$  = 8.4 Hz, 2H), 7.30-7.24 (m, 6H), 7.13 (d,  $J$  = 8.4 Hz, 2H), 7.06-7.02 (m, 3H), 6.95 (s, 1H), 6.80-6.77 (m, 1H), 6.07 (s, 1H), 4.96 (s, 1H), 3.35-3.30 (m, 1H), 2.43 (s, 3H), 1.82-1.76 (m, 1H), 1.70-1.63 (m, 1H), 1.25-1.09 (m, 12H), 0.88 (t,  $J$  = 7.2 Hz, 3H); <sup>13</sup>C NMR (100 MHz, CDCl<sub>3</sub>)  $\delta$  156.1, 148.8, 147.3, 145.1, 142.6, 140.6, 140.4, 130.1, 129.6, 129.0, 128.6, 120.9, 120.7, 117.5, 50.6, 50.4, 31.8, 29.9, 29.7, 29.4, 29.3, 24.2, 22.7, 21.7, 14.1; IR (film)  $\nu$  3062, 3028, 2927, 1606, 1509, 1464  $\text{cm}^{-1}$ ; HRMS (EI) calcd for  $\text{C}_{37}\text{H}_{38}\text{O}_3\text{SCl}_2$  (M) 632.1919, found 632.1927.

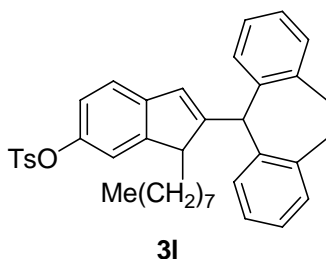

Indene **3l**, colorless oil;  $^1\text{H}$  NMR (400 MHz,  $\text{CDCl}_3$ )  $\delta$  7.67 (d,  $J = 8.4$  Hz, 2H), 7.35-7.32 (m, 1H), 7.25 (d,  $J = 8.4$  Hz, 2H), 7.19-7.08 (m, 7H), 6.97 (d,  $J = 8.4$  Hz, 1H), 6.83 (s, 1H), 6.76-6.73 (m, 1H), 5.91 (s, 1H), 4.77 (s, 1H), 3.43-3.39 (m, 1H), 3.28-3.21 (m, 1H), 3.10-3.85 (m, 2H), 2.54-2.48 (m, 1H), 2.41 (s, 3H), 1.82-1.68 (m, 2H), 1.33-1.00 (m, 12H), 0.90 (t,  $J = 7.2$  Hz, 3H);  $^{13}\text{C}$  NMR (100 MHz,  $\text{CDCl}_3$ )  $\delta$  157.9, 149.0, 146.8, 145.0, 142.9, 141.4, 141.1, 138.7, 137.8, 132.7, 131.7, 131.6, 129.7, 129.6, 129.3, 128.3, 127.6, 126.9, 126.3, 125.9, 120.5, 117.2, 55.3, 49.7, 31.9, 29.8, 29.5, 29.3, 22.7, 21.7, 14.1; IR (film)  $\nu$  3061, 3017, 2927, 1598, 1494, 1464  $\text{cm}^{-1}$ ; HRMS (EI) calcd for  $\text{C}_{39}\text{H}_{42}\text{O}_3\text{S}$  (M) 590.2855, found 590.2852.

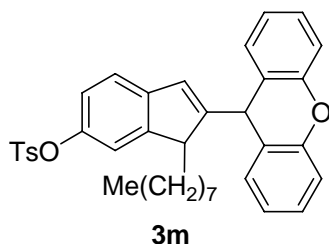

Indene **3m**, colorless oil;  $^1\text{H}$  NMR (400 MHz,  $\text{CDCl}_3$ )  $\delta$  7.65 (d,  $J = 8.4$  Hz, 2H), 7.28-7.00 (m, 11H), 6.86 (s, 1H), 6.74-6.71 (m, 1H), 6.25 (s, 1H), 5.08 (s, 1H), 3.30-3.27 (m, 1H), 2.40 (s, 3H), 1.89-1.79 (m, 1H), 1.75-1.67 (m, 1H), 1.30-1.02 (m, 12H), 0.88 (t,  $J = 7.2$  Hz, 3H);  $^{13}\text{C}$  NMR (100 MHz,  $\text{CDCl}_3$ )  $\delta$  156.7, 151.8, 151.5, 149.0, 147.1, 145.0, 142.6, 132.5, 129.6, 129.5, 128.8, 128.6, 128.2, 128.1, 127.5, 123.4, 123.2, 123.1, 122.8, 120.9, 120.5, 117.2, 116.8, 116.7, 49.3, 39.7, 29.7, 29.4, 29.3, 23.8, 22.7, 21.7, 14.1; IR (film)  $\nu$  3065, 3041, 2926, 1599, 1575, 1476, 1458  $\text{cm}^{-1}$ ; HRMS (EI) calcd for  $\text{C}_{37}\text{H}_{38}\text{O}_4\text{S}$  (M) 578.2491, found 578.2483.

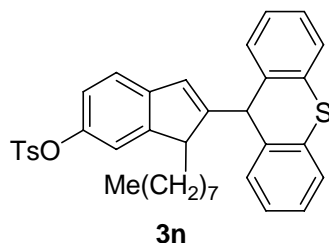

Indene **3n**, colorless oil;  $^1\text{H}$  NMR (400 MHz,  $\text{CDCl}_3$ )  $\delta$  7.63 (d,  $J = 8.4$  Hz, 2H), 7.48-7.42 (m, 2H), 7.36-7.15 (m, 8H), 6.91-6.88 (m, 2H), 6.67-6.40 (m, 1H), 5.83 (s, 1H), 5.01 (s, 1H), 3.10-3.07 (m, 1H), 2.38 (s, 3H), 1.99-1.94 (m, 2H), 1.33-1.22 (m, 12H), 0.90 (t,  $J = 6.8$  Hz, 3H);  $^{13}\text{C}$  NMR (100 MHz,  $\text{CDCl}_3$ )  $\delta$  151.0, 149.2, 147.0, 145.0, 142.8, 136.3, 135.7, 133.4, 133.1, 132.6, 129.6, 128.6, 127.4, 127.1, 127.0, 126.8, 126.7, 121.9, 120.8, 120.4, 117.2, 49.3, 48.9, 31.9, 30.0, 29.6, 29.4, 23.8, 22.7, 21.7, 14.2; IR (film)  $\nu$  3062, 3014, 2927, 1597, 1466  $\text{cm}^{-1}$ ; HRMS (EI) calcd for  $\text{C}_{37}\text{H}_{38}\text{O}_3\text{S}_2$  (M) 594.2262, found 594.2266.

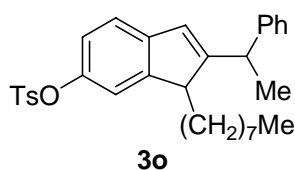



Indene **3o**, 54:46 dr, colorless oil;  $^1\text{H}$  NMR (400 MHz,  $\text{CDCl}_3$ )  $\delta$  7.68 (d,  $J = 8.0$  Hz, 2H), 7.33-7.14 (m, 8H), 7.00-6.95 (m, 1H), 6.87-6.82 (m, 1H), 6.67 (s, 1H), 3.78-3.65 (m, 1H), 3.08-3.05 (m, 1H), 2.42 (s, 3H), 1.87-1.60 (m, 2H), 1.54 (d,  $J = 7.2$  Hz, 3H), 1.29-1.11 (m, 12H), 0.87 (t,  $J = 7.2$  Hz, 3H); Partial  $^1\text{H}$  NMR for the minor diastereomer  $\delta$  6.03 (s, 1H), 3.51-3.48 (m, 1H), 1.52 (d,  $J = 7.2$  Hz, 3H); IR (film)  $\nu$  3062, 3027, 2927, 1599, 1496, 1464  $\text{cm}^{-1}$ ; HRMS (EI) calcd for  $\text{C}_{32}\text{H}_{38}\text{O}_3\text{S}$  (M) 502.2542, found 502.2549.

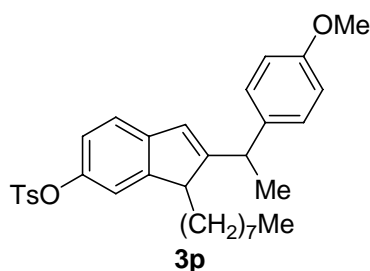

Indene **3p**, 55:45 dr, colorless oil;  $^1\text{H}$  NMR (400 MHz,  $\text{CDCl}_3$ )  $\delta$  7.68 (d,  $J = 8.0$  Hz, 2H), 7.26 (d,  $J = 8.4$  Hz, 2H), 7.19-7.13 (m, 1H), 7.06 (d,  $J = 8.8$  Hz, 1H), 7.00-6.95 (m, 1H), 6.89-6.73 (m, 4H), 6.64 (s, 1H), 3.77 (s, 3H), 3.73-3.62 (m, 1H), 3.13-3.02 (m, 1H), 2.42 (s, 3H), 1.88-1.59 (m, 2H), 1.51 (d,  $J = 7.6$  Hz, 3H), 1.30-1.05 (m, 12H), 0.87 (t,  $J = 7.2$  Hz, 3H); Partial  $^1\text{H}$  NMR for the minor diastereomer  $\delta$  6.63 (s, 1H), 3.80 (s, 3H), 3.50-3.46 (m, 1H), 1.49 (d,  $J = 7.6$  Hz, 3H); IR (film)  $\nu$  3063, 3029, 2927, 1602, 1510, 1464  $\text{cm}^{-1}$ ; HRMS (EI) calcd for  $\text{C}_{33}\text{H}_{40}\text{O}_4\text{S}$  (M) 532.2647, found 532.2642.

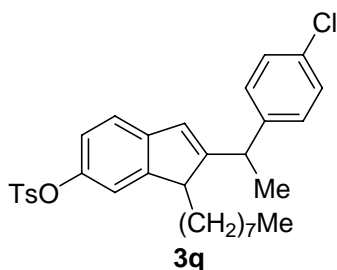

Indene **3q**, 93:7 dr, colorless oil;  $^1\text{H}$  NMR (400 MHz,  $\text{CDCl}_3$ )  $\delta$  7.69 (d,  $J = 8.4$  Hz, 2H), 7.29-7.22 (m, 4H), 7.16 (d,  $J = 8.0$  Hz, 1H), 7.08 (d,  $J = 8.4$  Hz, 2H), 6.96-6.83 (m, 2H), 6.67 (s, 1H), 3.70-3.65 (m, 1H), 3.06-3.03 (m, 1H), 2.43 (s, 3H), 1.78-1.70 (m, 1H), 1.69-1.60 (m, 1H), 1.52 (d,  $J = 7.2$  Hz, 3H), 1.29-1.13 (m, 12H), 0.87 (t,  $J = 7.2$  Hz, 3H); Partial  $^1\text{H}$  NMR for the minor diastereomer  $\delta$  6.03 (s, 1H), 3.50-3.47 (m, 1H); IR (film)  $\nu$  3065, 3028, 2927, 1598, 1490, 1465  $\text{cm}^{-1}$ ; HRMS (EI) calcd for  $\text{C}_{32}\text{H}_{37}\text{ClO}_3\text{S}$  (M) 536.2174, found 536.2155.

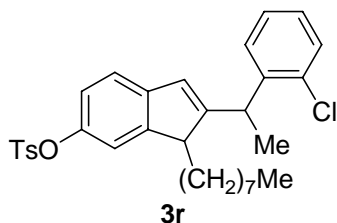

Indene **3r**, 65:35 dr, colorless oil; <sup>1</sup>H NMR (400 MHz, CDCl<sub>3</sub>) δ 7.70 (d, *J* = 8.4 Hz, 2H), 7.40-7.34 (m, 1H), 7.27 (d, *J* = 8.8 Hz, 2H), 7.21-7.10 (m, 3H), 7.03-6.95 (m, 1H), 6.90-6.75 (m, 2H), 6.71 (s, 1H), 4.35-4.26 (m, 1H), 3.10-3.06 (m, 1H), 2.42 (s, 3H), 1.90-1.59 (m, 2H), 1.50 (d, *J* = 6.8 Hz, 3H), 1.25-1.10 (m, 12H), 0.87 (t, *J* = 7.2 Hz, 3H); Partial <sup>1</sup>H NMR for the minor diastereomer δ 7.68 (d, *J* = 8.4 Hz, 2H), 6.00 (s, 1H), 3.52-3.48 (m, 1H), 1.51 (d, *J* = 7.2 Hz, 3H); IR (film) ν 3064, 2927, 1598, 1577, 1496, 1467 cm<sup>-1</sup>; HRMS (EI) calcd for C<sub>32</sub>H<sub>37</sub>ClO<sub>3</sub>S (M) 536.2174, found 536.2160.

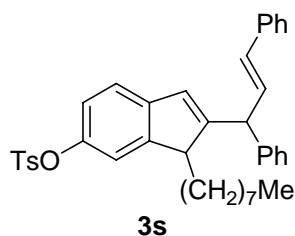

Indene **3s**, 50:50 dr, colorless oil; <sup>1</sup>H NMR (400 MHz, CDCl<sub>3</sub>) δ 7.10-7.67 (m, 2H), 7.32-7.12 (m, 12H), 7.05-6.95 (m, 2H), 6.82-6.67 (m, 1H), 6.46 (s, 1H), 6.42-6.31 (m, 2H), 4.44 (d, *J* = 7.2 Hz, 1H), 3.21-3.18 (m, 1H), 2.42 (s, 3H), 1.91-1.73 (m, 2H), 1.30-1.15 (m, 12H), 0.88 (t, *J* = 7.2 Hz, 3H); Partial <sup>1</sup>H NMR for the other diastereomer δ 6.14 (s, 1H), 4.50 (d, *J* = 7.6 Hz, 1H), 3.57-3.54 (m, 1H); IR (film) ν 3060, 3027, 1598, 1496, 1464 cm<sup>-1</sup>; HRMS (EI) calcd for C<sub>39</sub>H<sub>42</sub>O<sub>3</sub>S (M) 590.2855, found 590.2848.

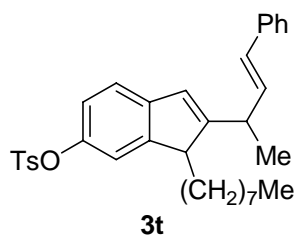

Indene **3t**, 55:45 dr, colorless oil; <sup>1</sup>H NMR (400 MHz, CDCl<sub>3</sub>) δ 7.69 (d, *J* = 8.4 Hz, 2H), 7.40 (d, *J* = 8.4 Hz, 1H), 7.35-7.15 (m, 6H), 7.13-6.91 (m, 2H), 6.83-6.76 (m, 1H), 6.46-6.33 (m, 3H), 3.48-3.40 (m, 1H), 3.35-3.27 (m, 1H), 2.43 (s, 3H), 1.90-1.78 (m, 1H), 1.76-1.68 (m, 1H), 1.35 (d, *J* = 6.8 Hz, 3H), 1.30-1.09 (m, 12H), 0.86 (t, *J* = 7.2 Hz, 3H); Partial <sup>1</sup>H NMR for the minor diastereomer δ 6.13-6.06 (m, 1H), 3.34-3.28 (m, 1H), 1.42 (d, *J* = 6.8 Hz, 3H); IR (film) ν 3060, 3026, 2927, 1598, 1496, 1465 cm<sup>-1</sup>; HRMS (EI) calcd for C<sub>34</sub>H<sub>40</sub>O<sub>3</sub>S (M) 528.2698, found 528.2672.

## References

- 1 C.-R. Liu, F.-L. Yang, Y.-Z. Jin, X.-T. Ma, D.-J. Cheng, N. Li and S.-K. Tian, *Org. Lett.*, 2010, **12**, 3832.
- 2 J. Kuang and S. Ma, *J. Am. Chem. Soc.*, 2010, **132**, 1786.
- 3 Q. Xiao, Y. Xia, H. Li, Y. Zhang and J. Wang, *Angew. Chem., Int. Ed.*, 2011, **50**, 1114.

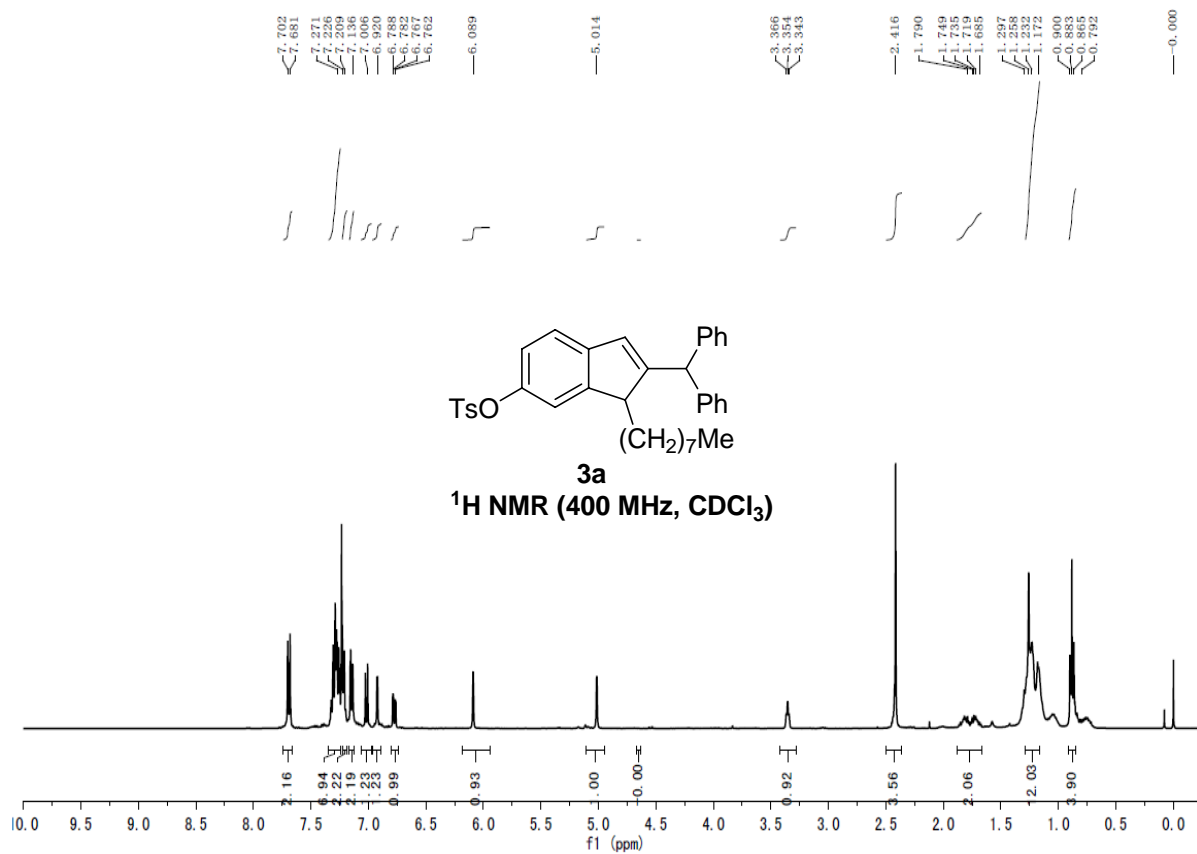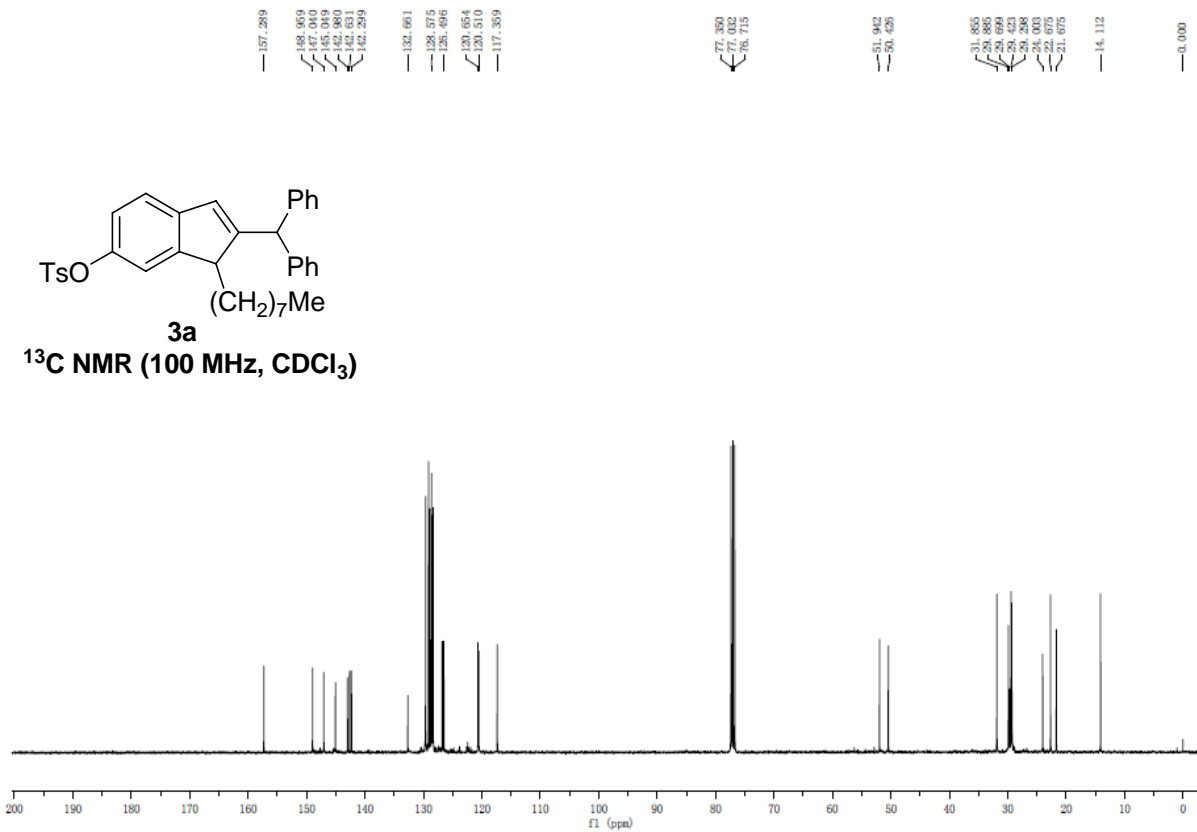

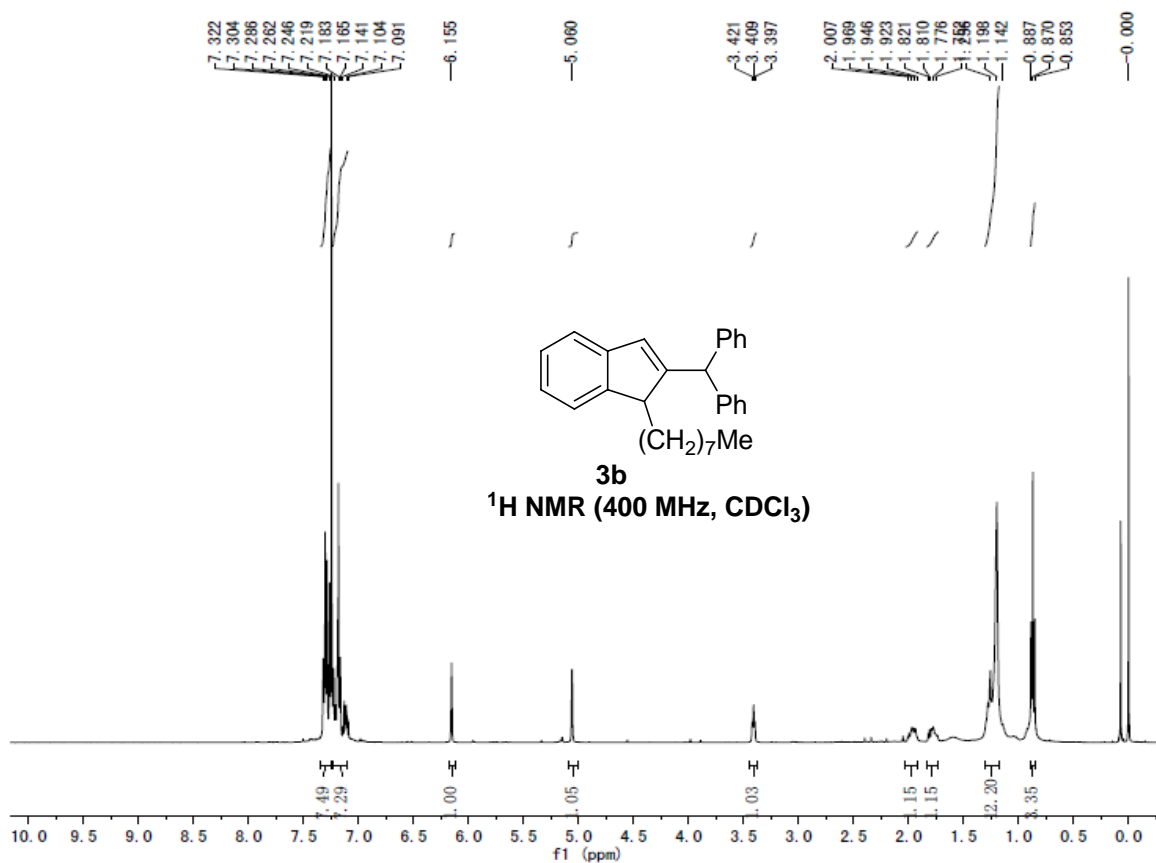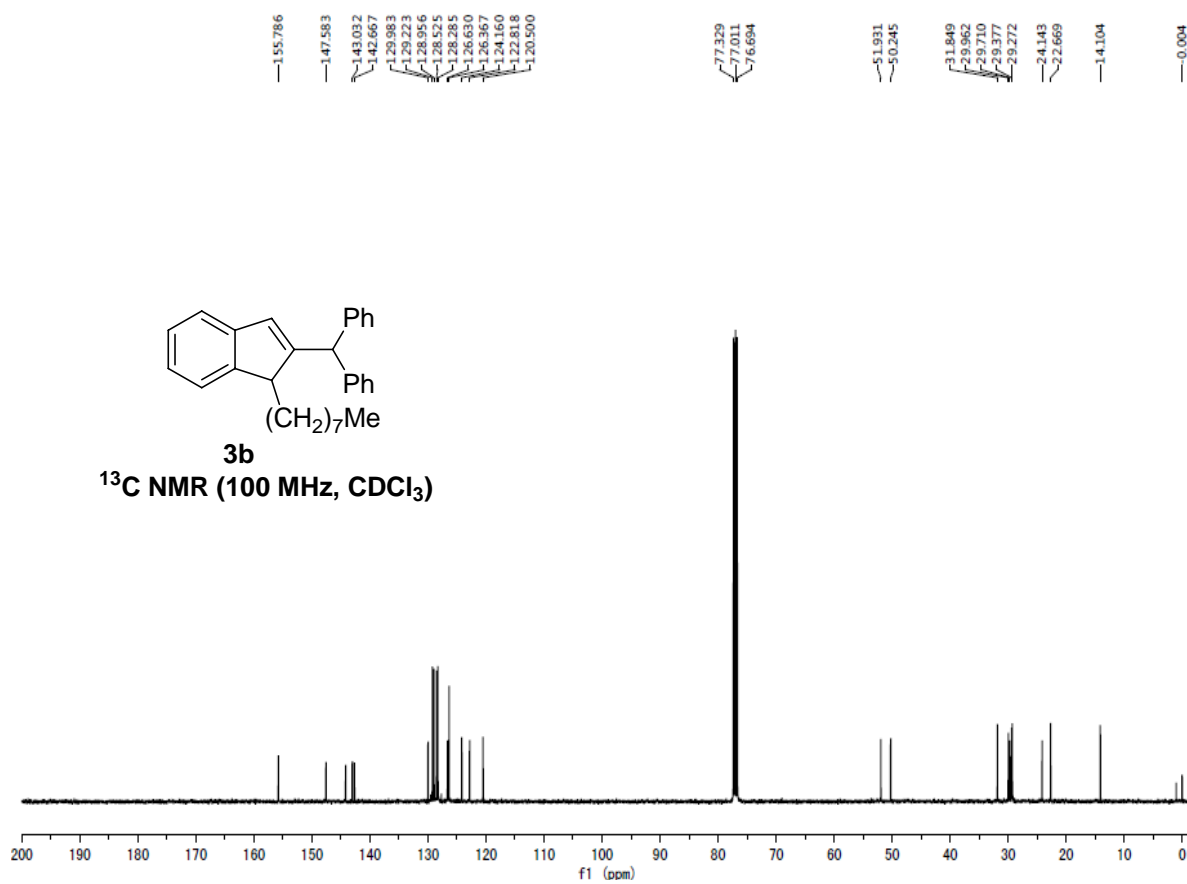

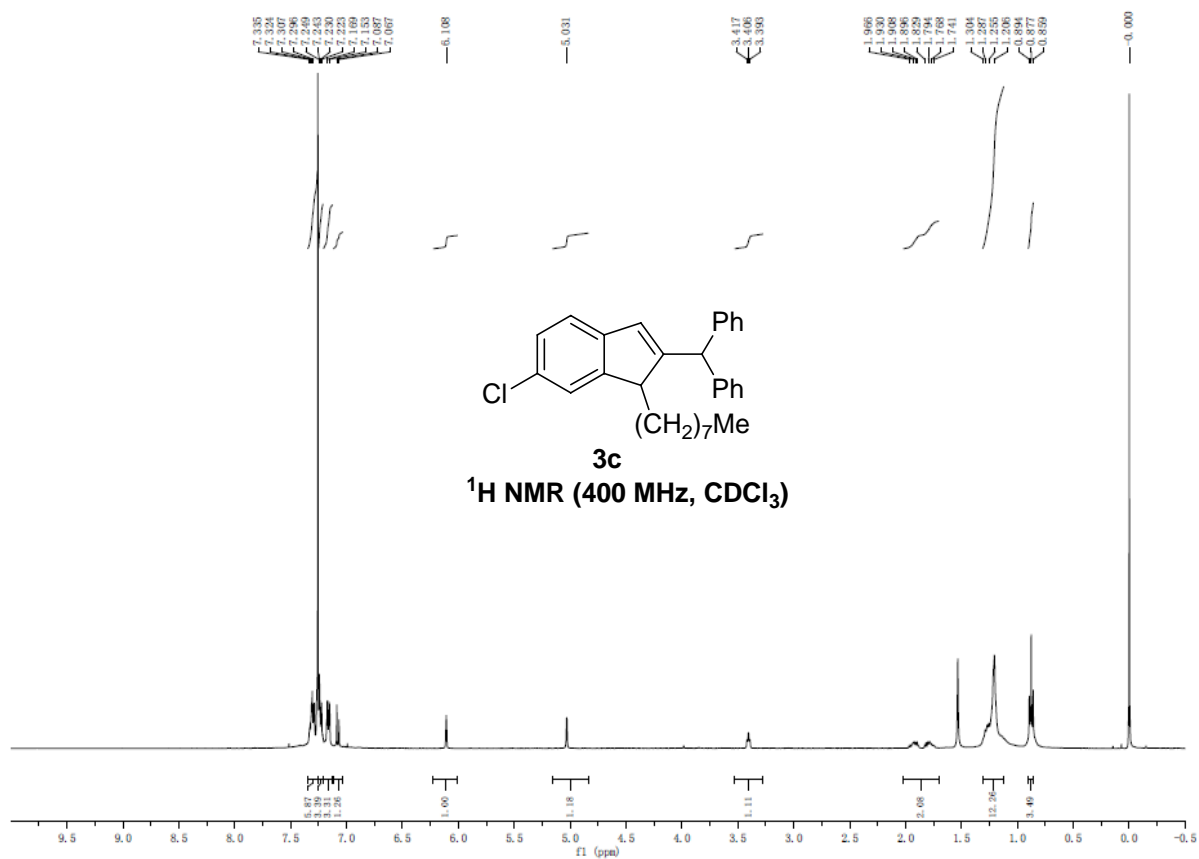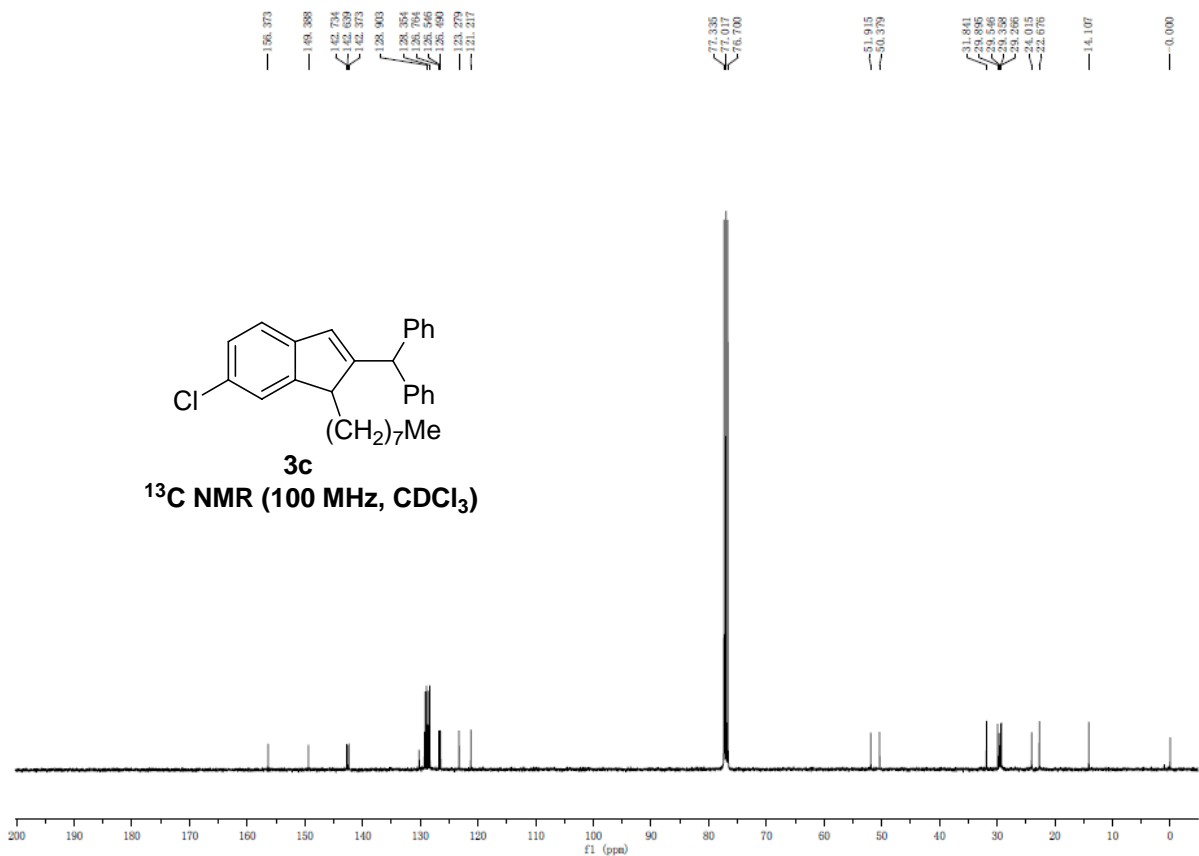

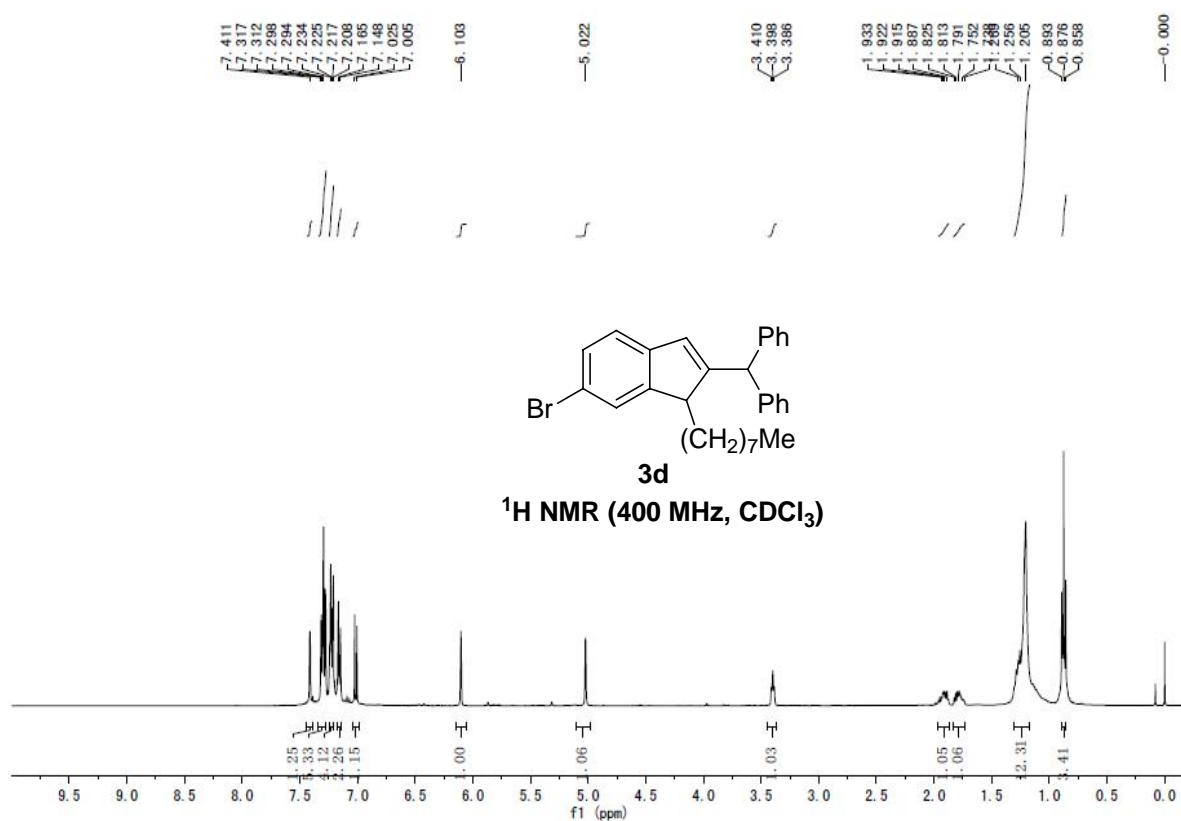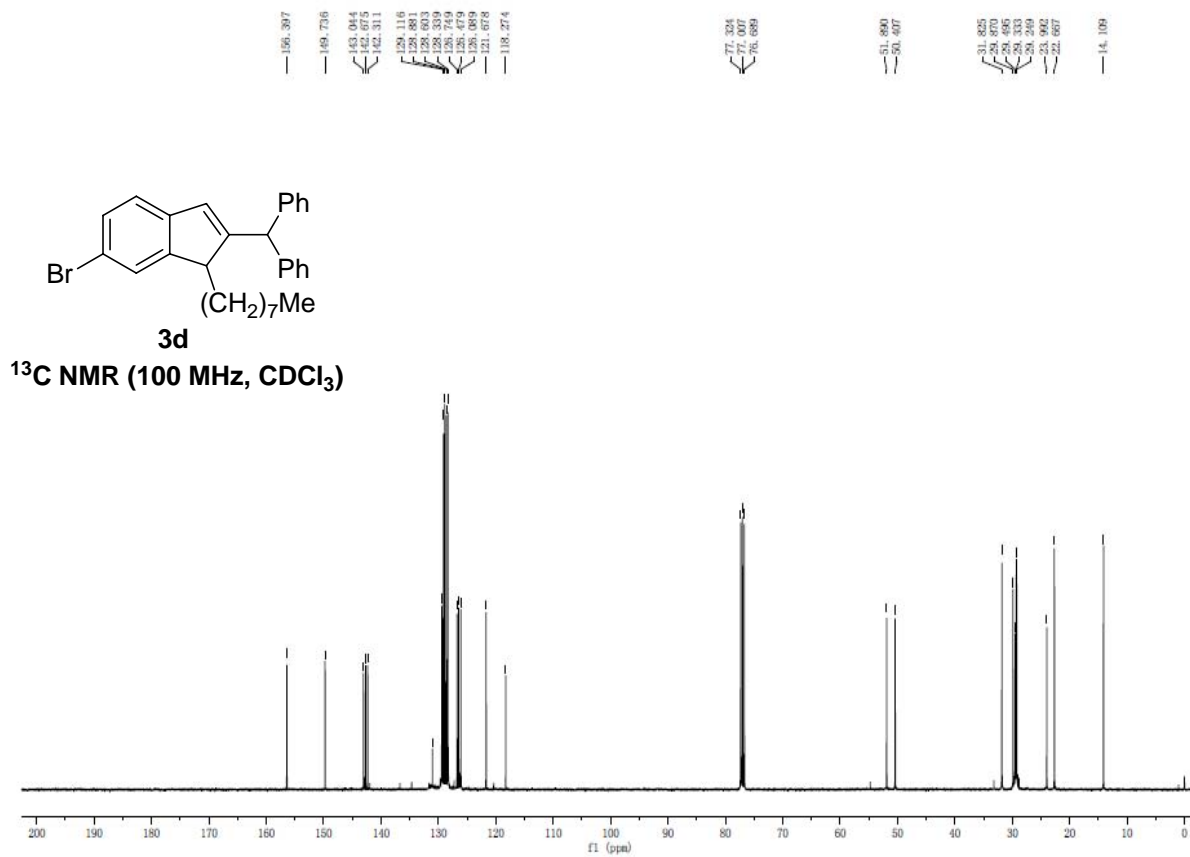

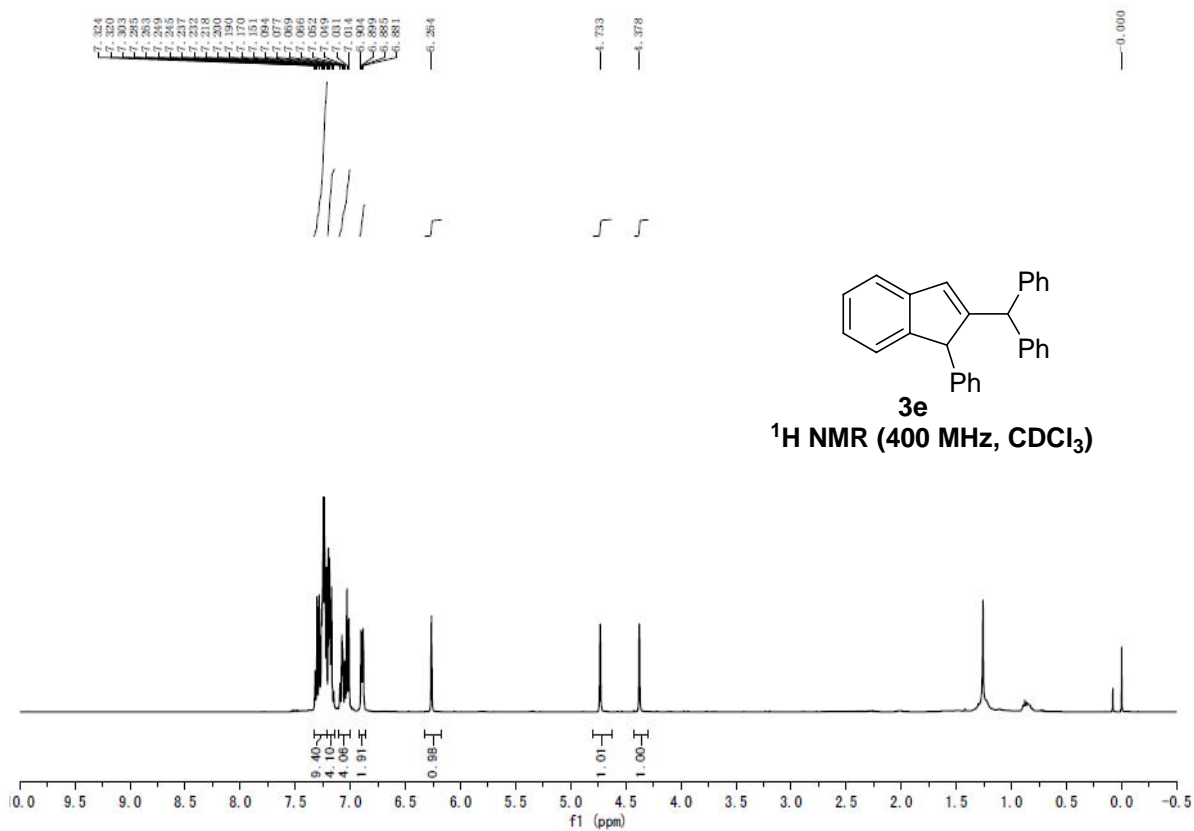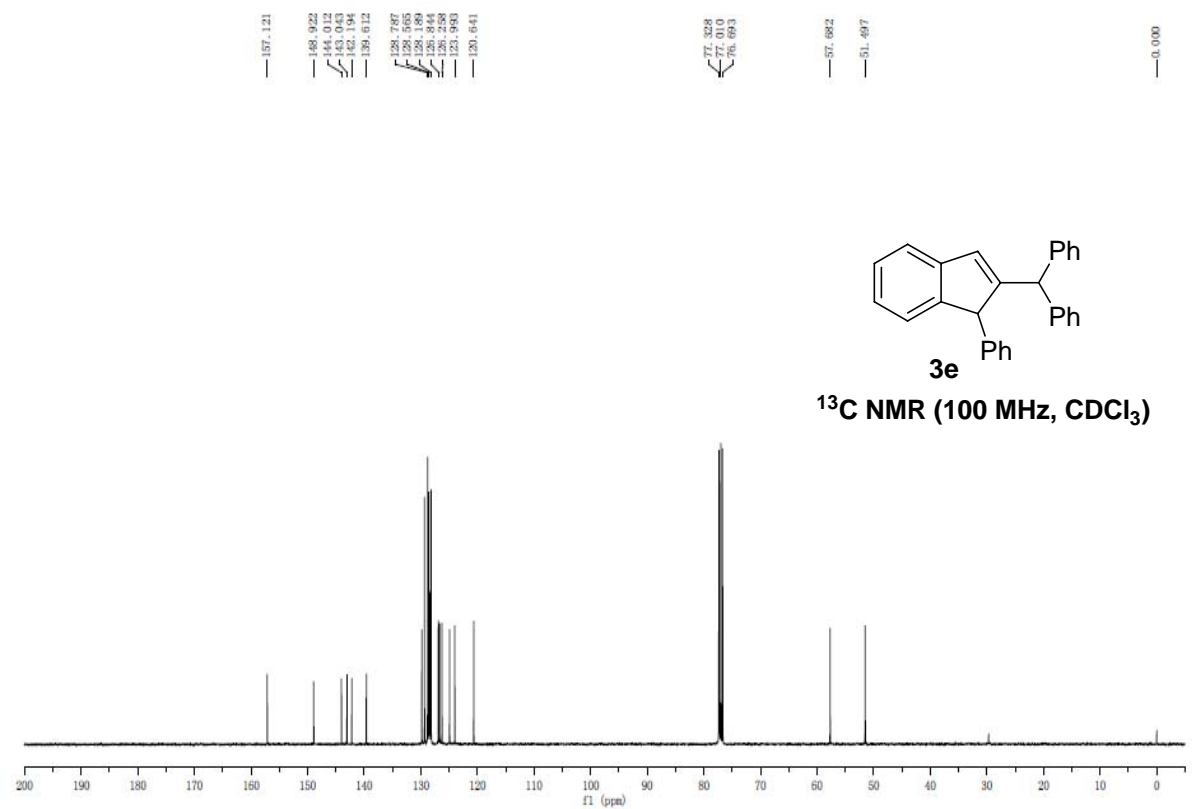



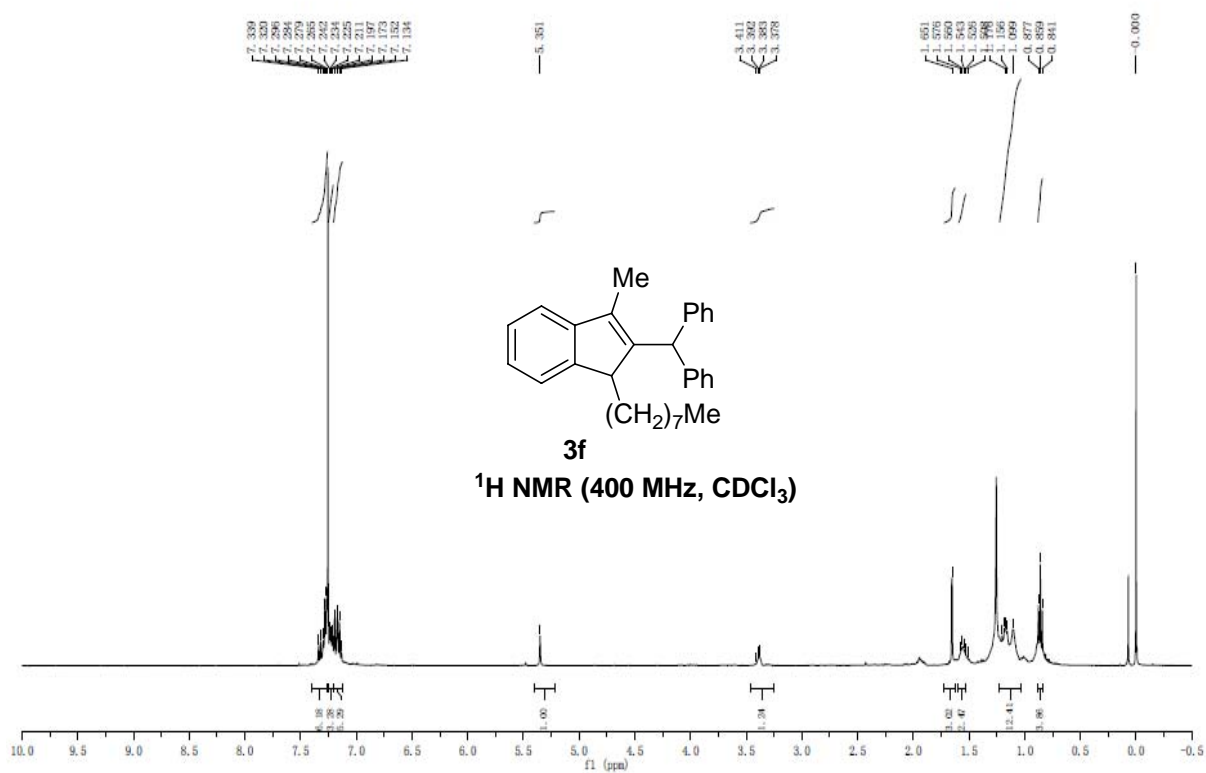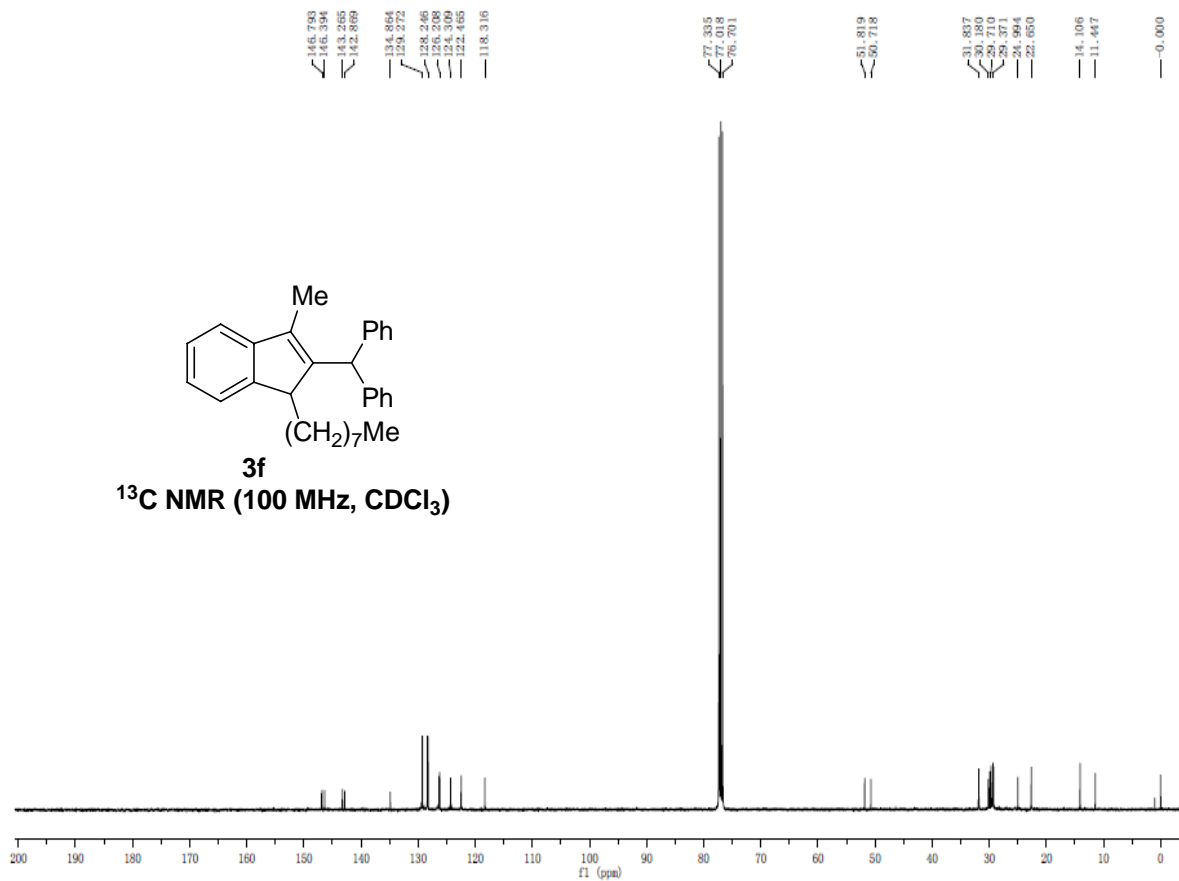

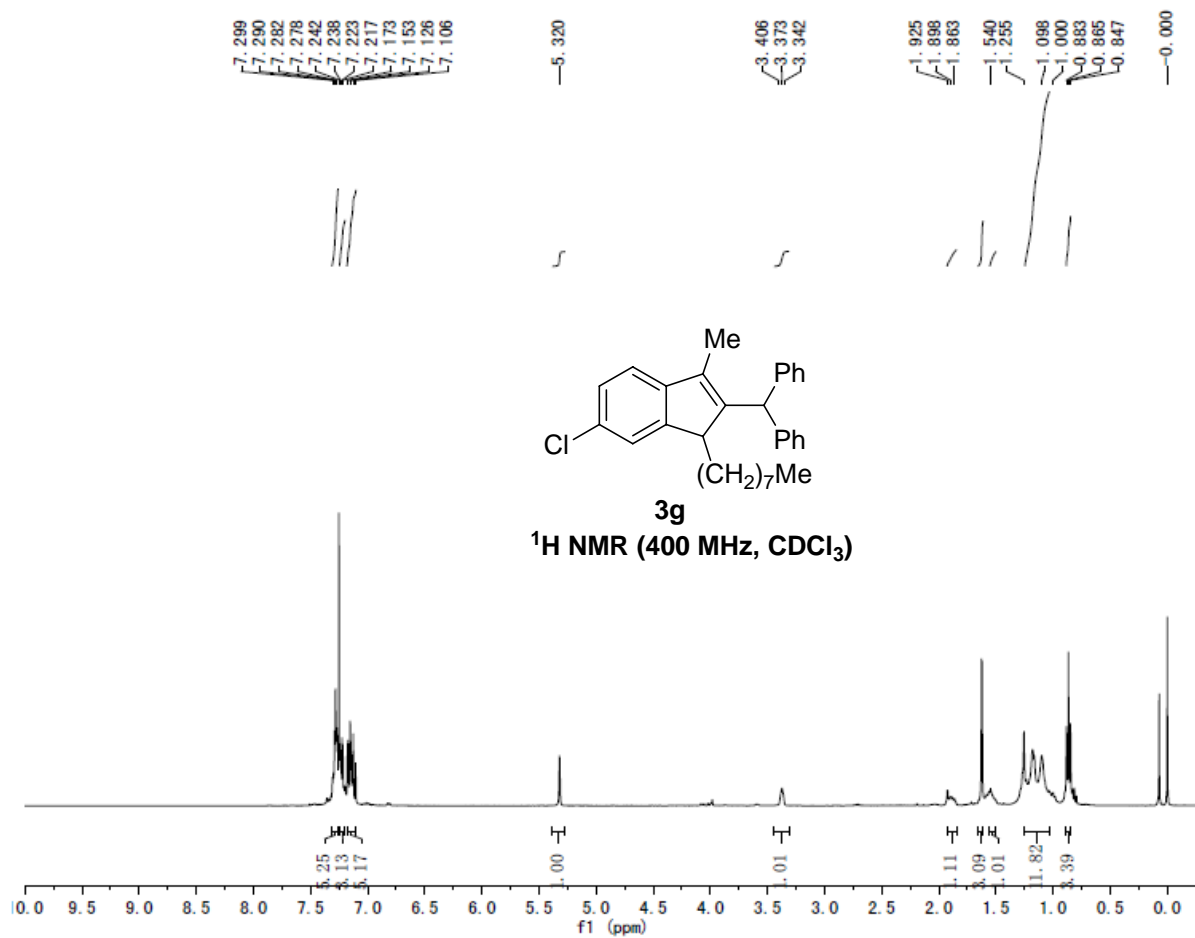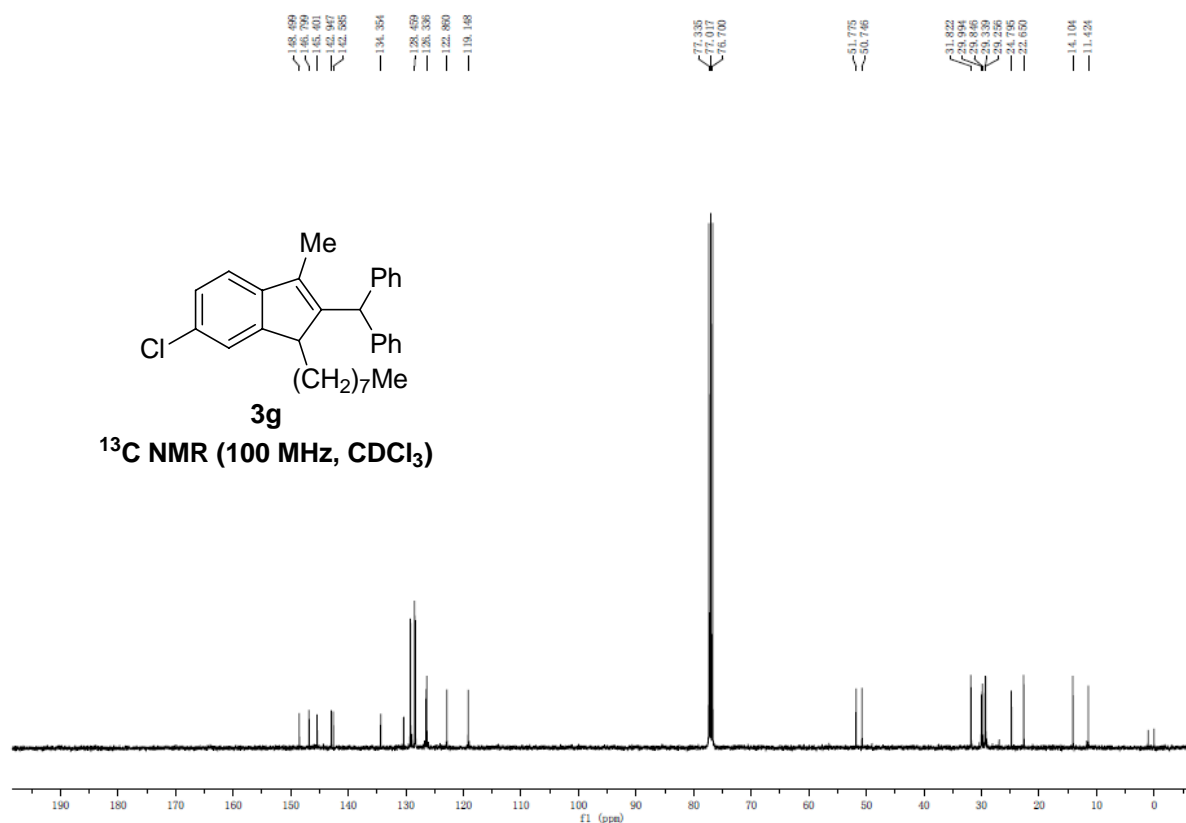

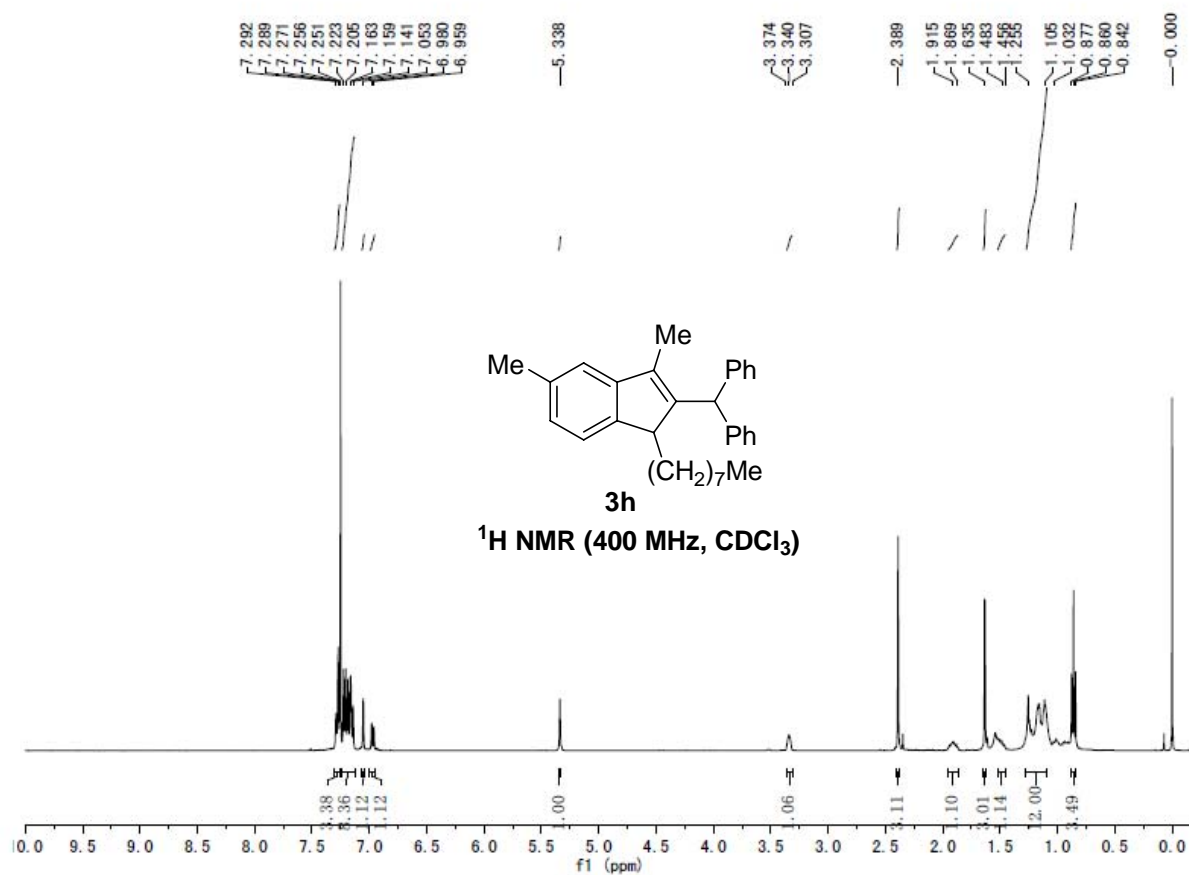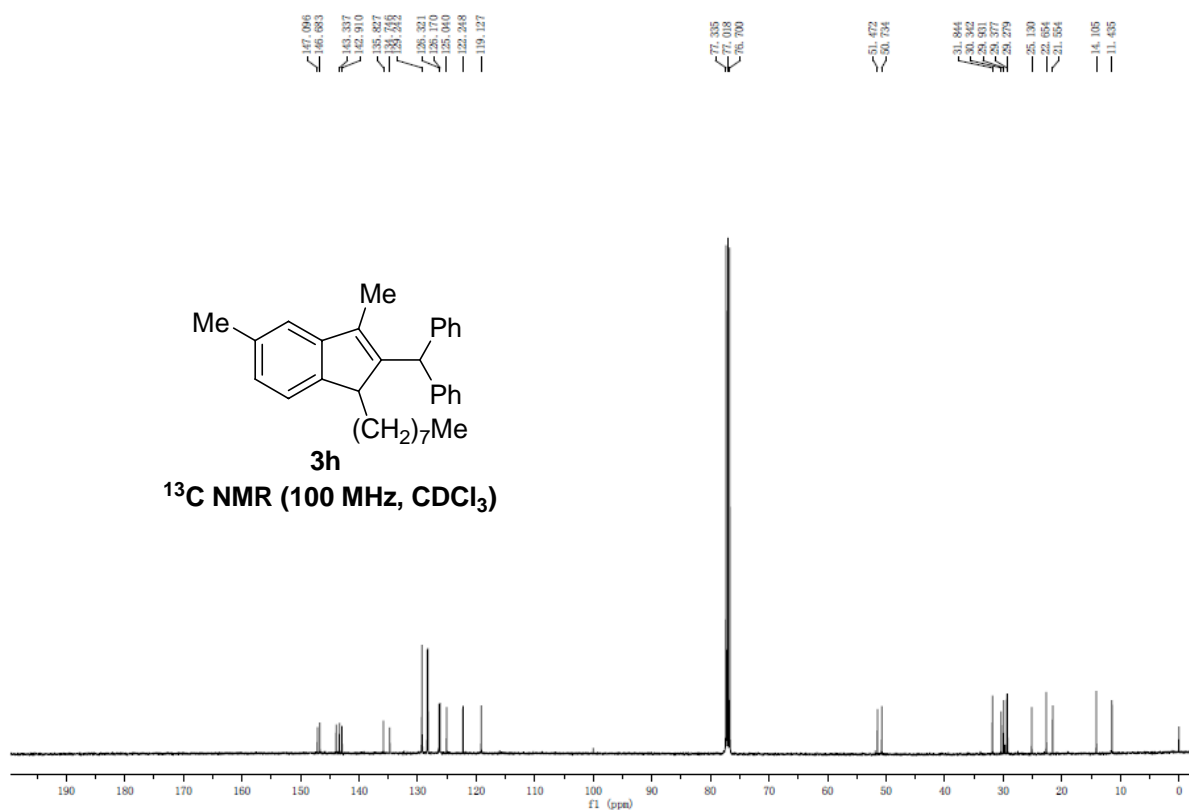

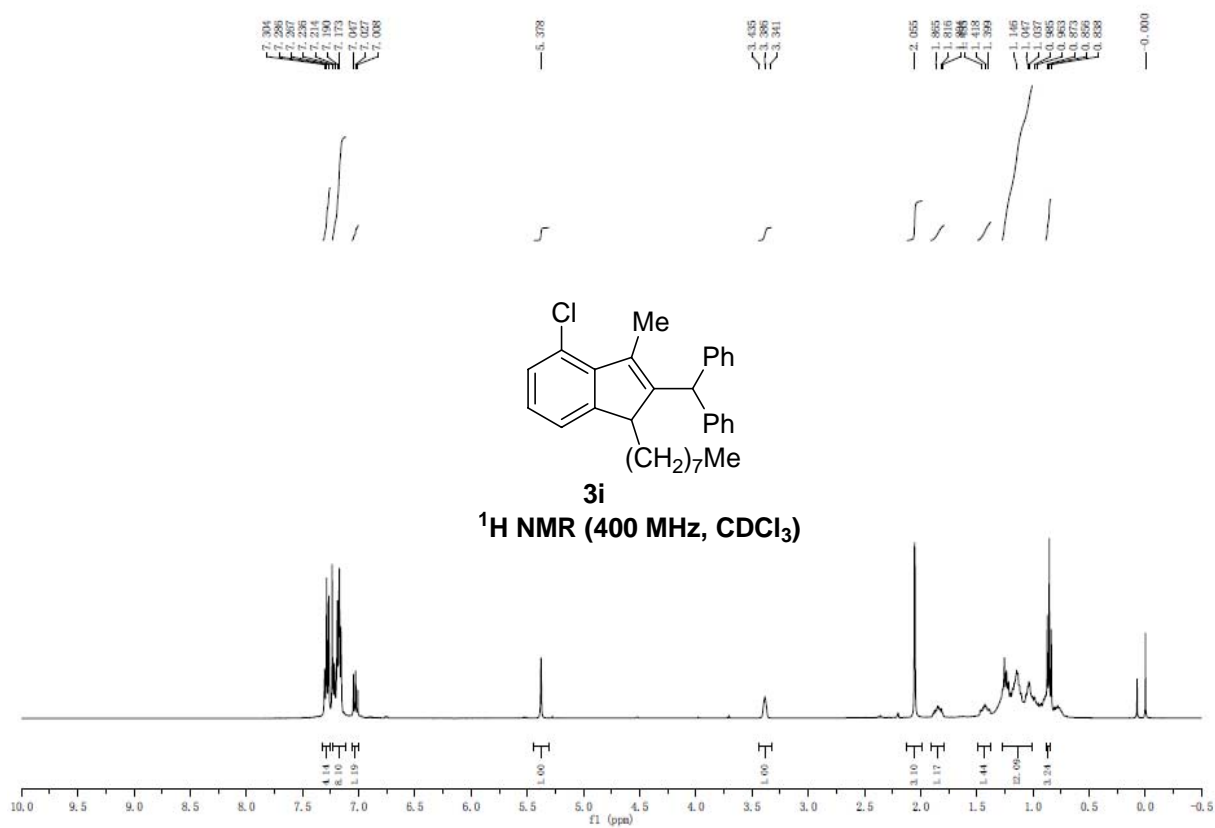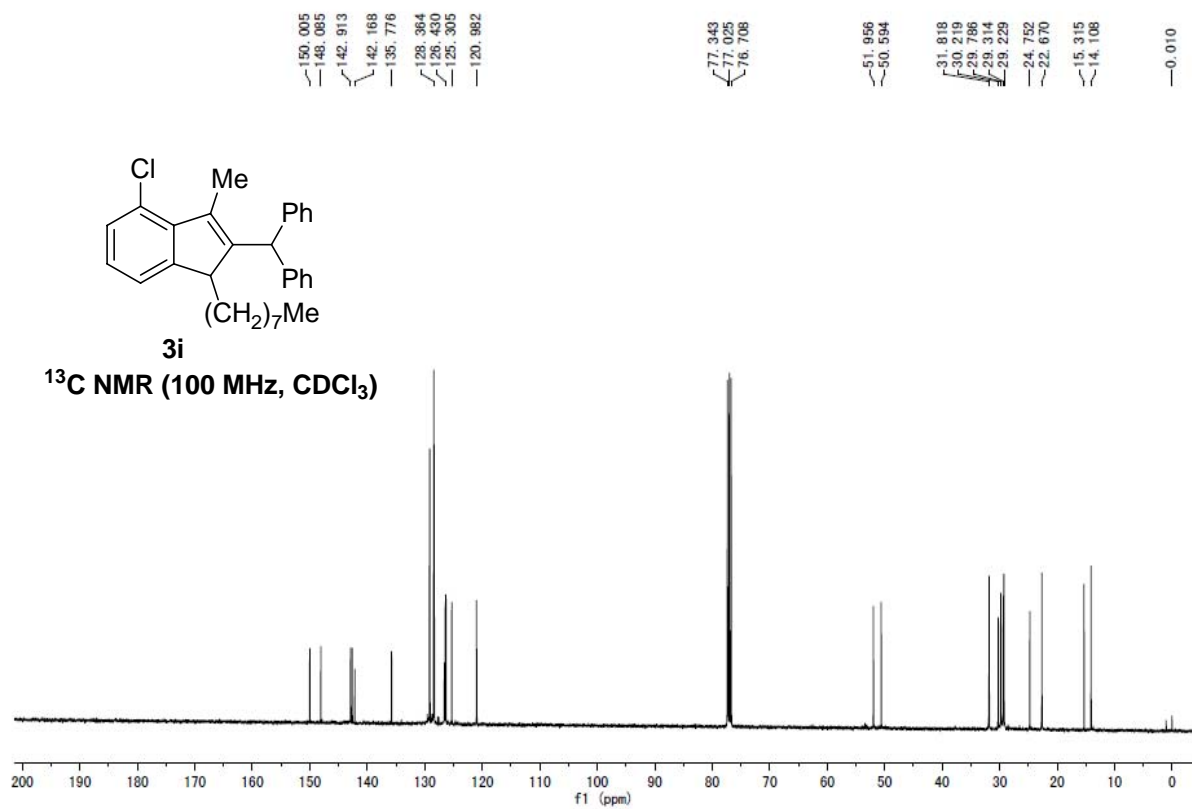

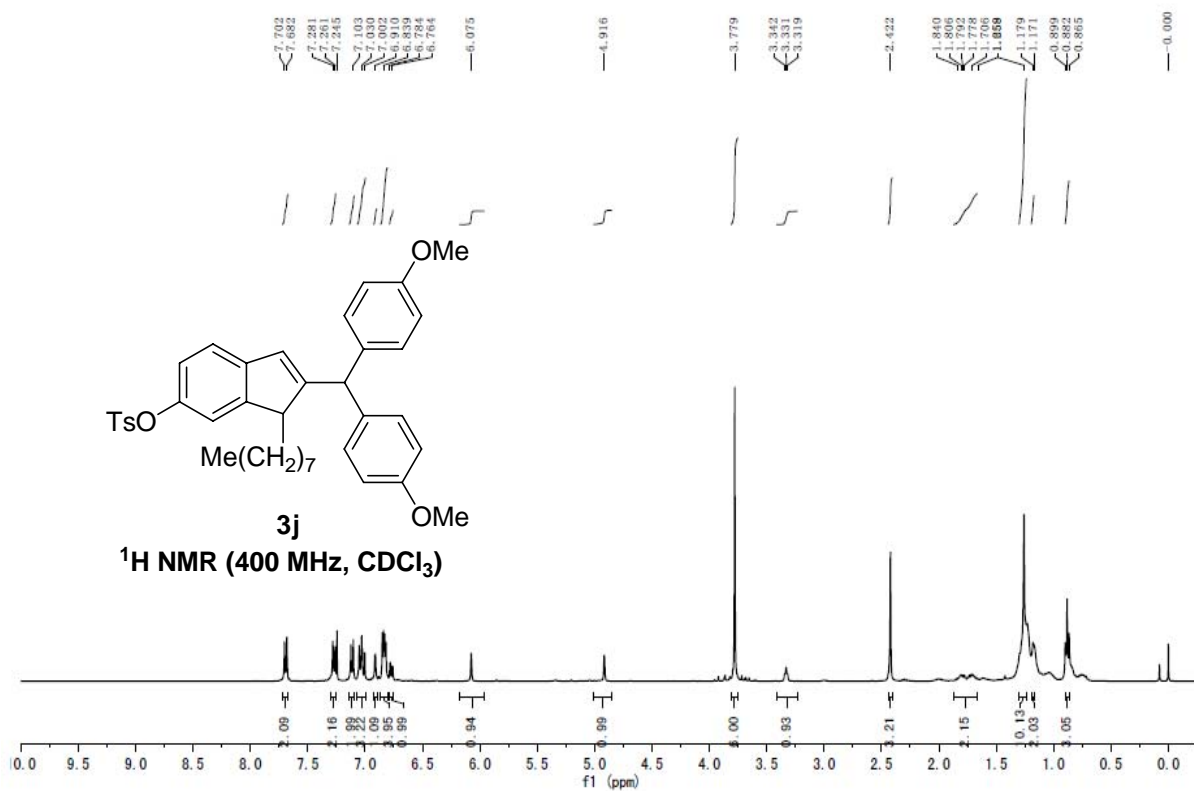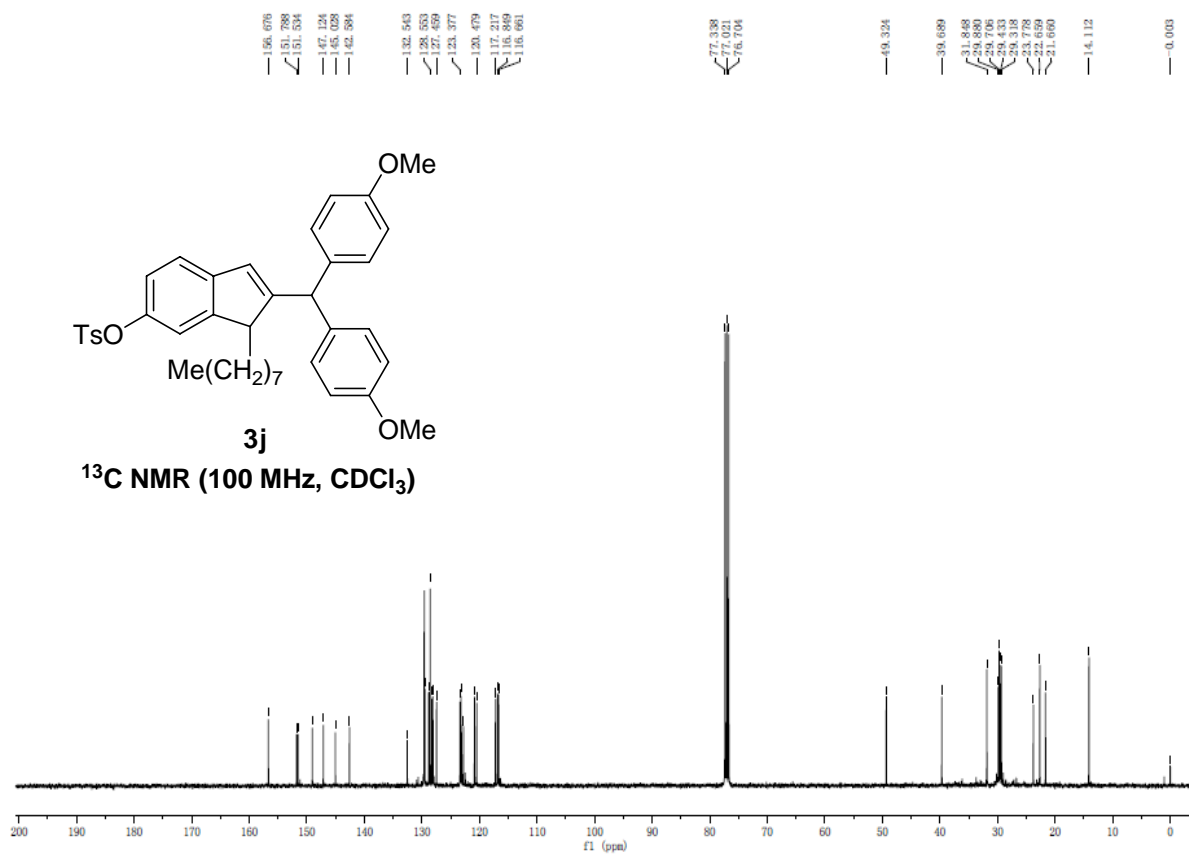

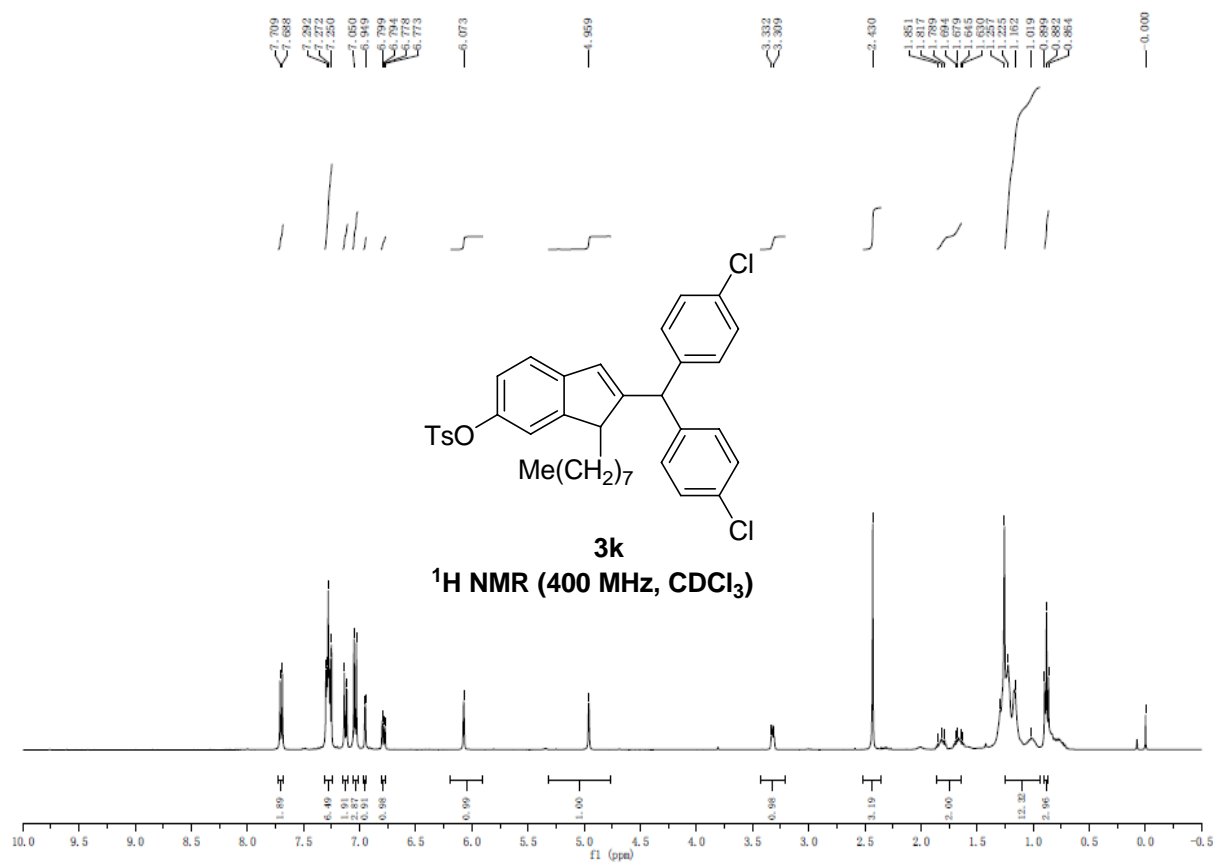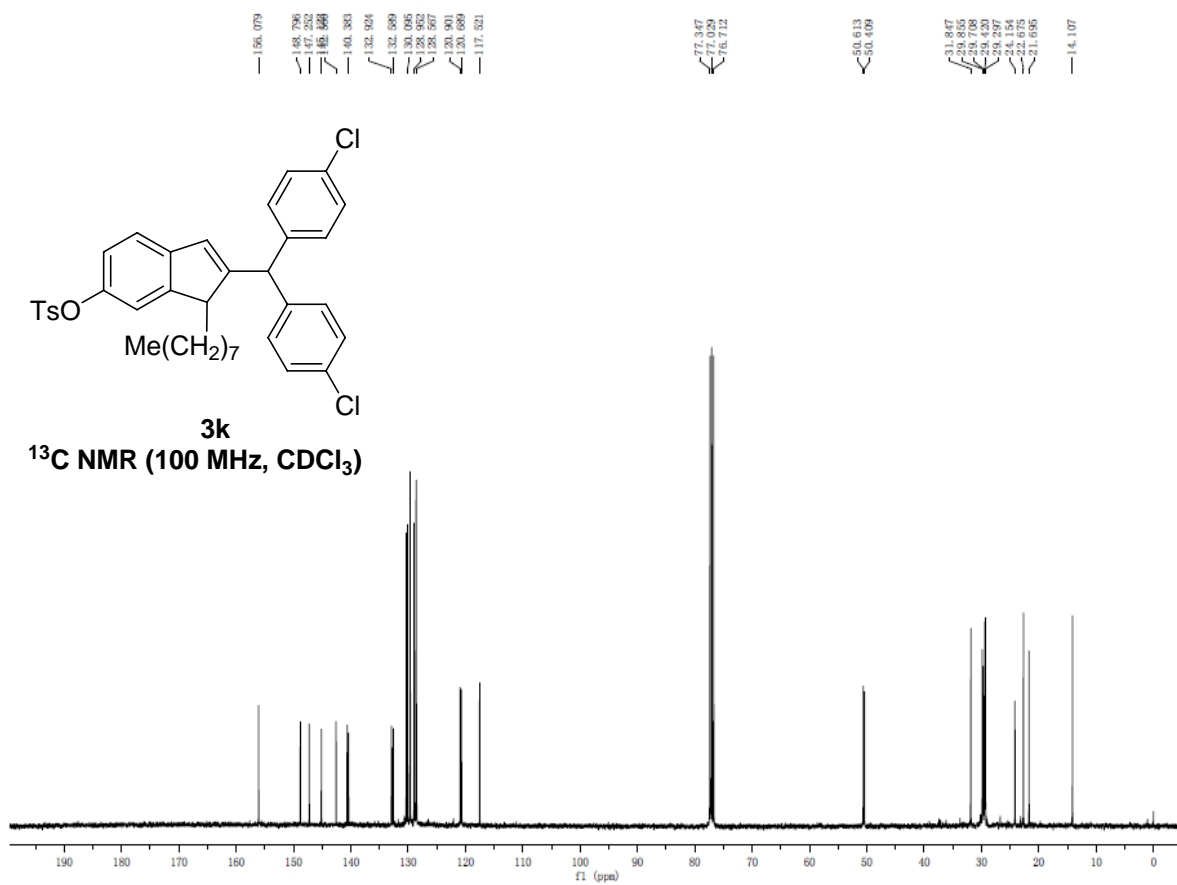

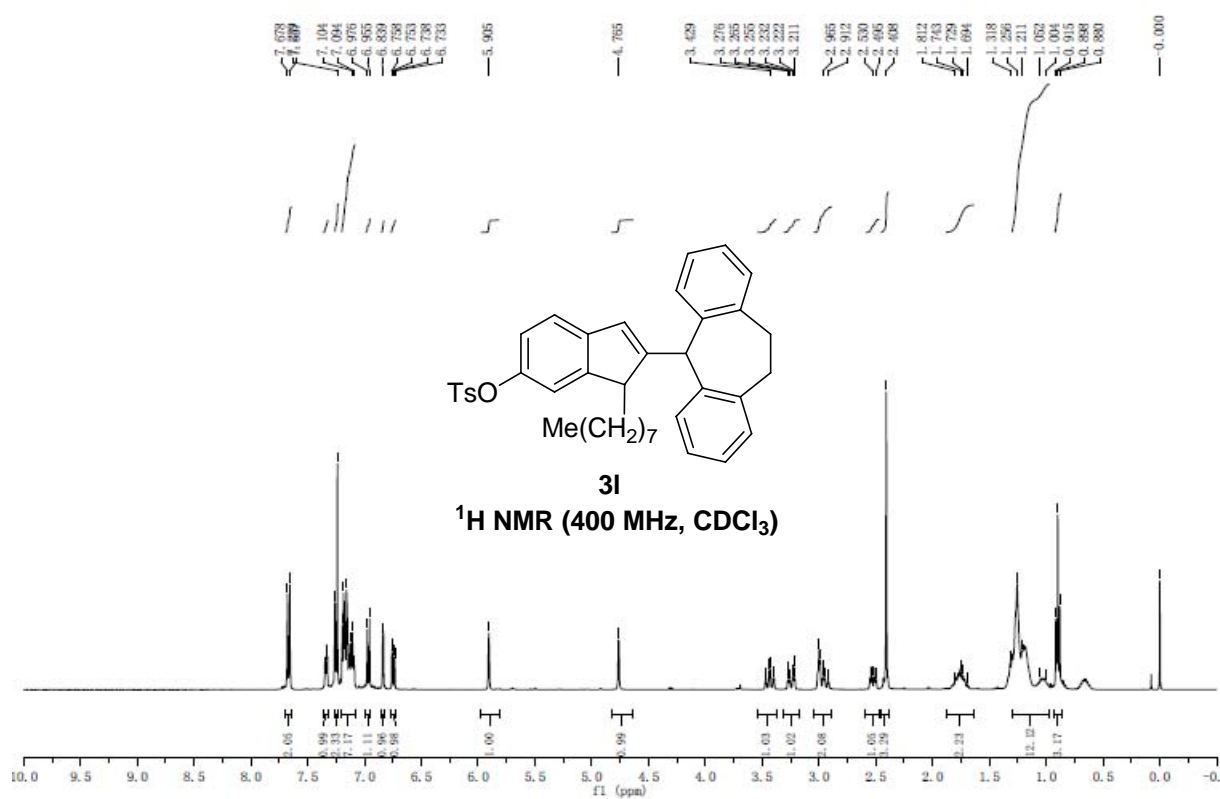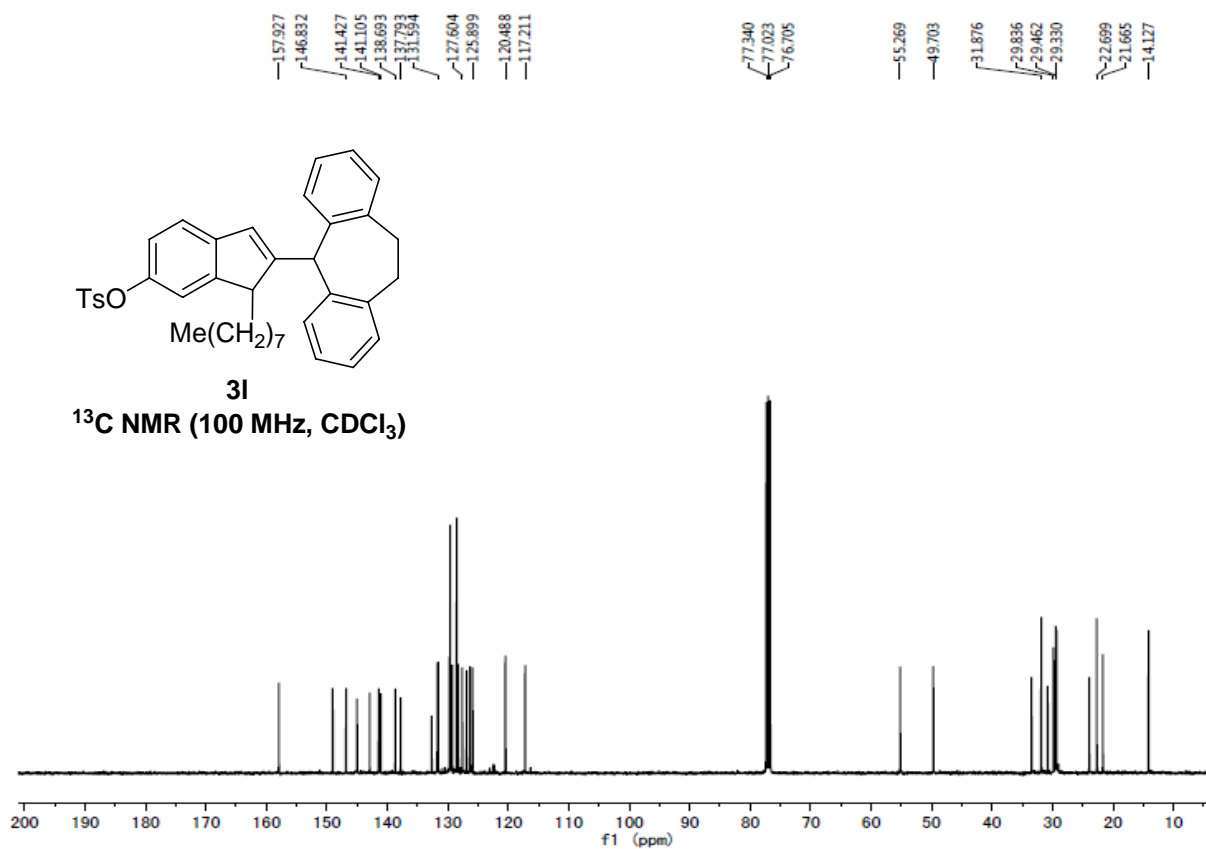

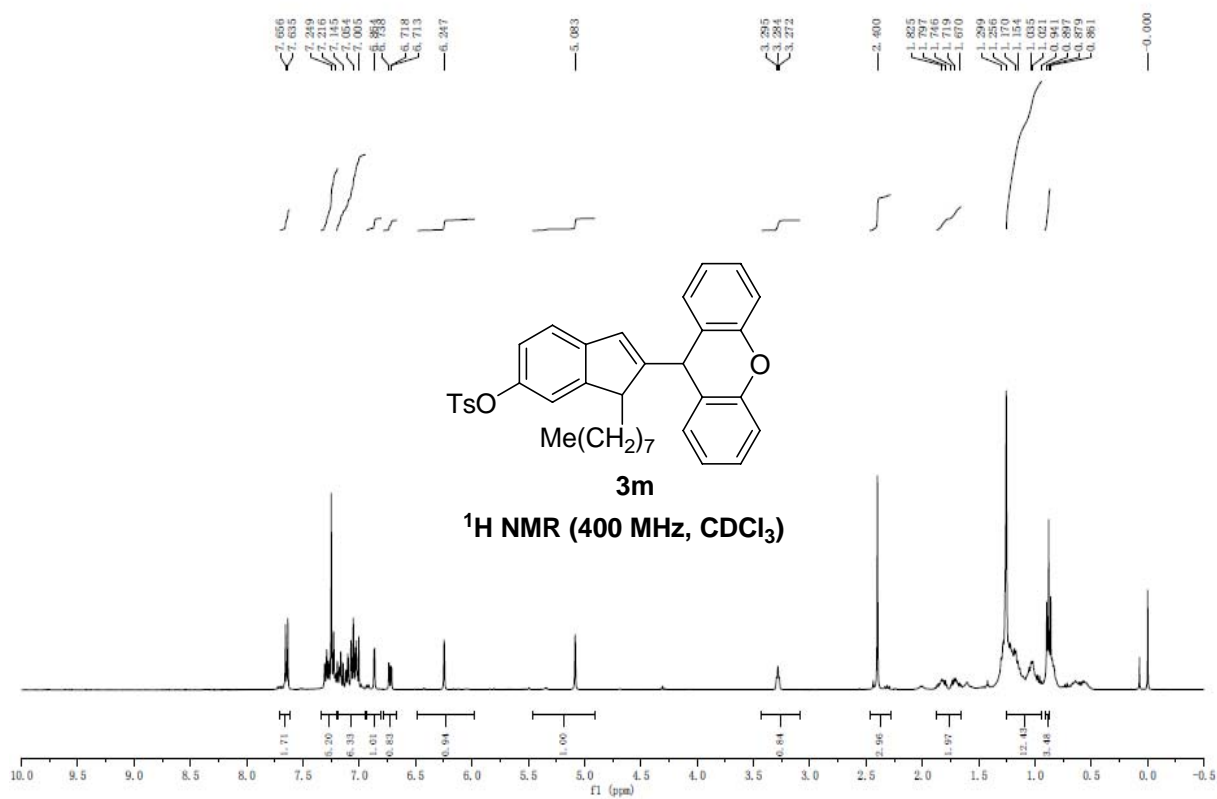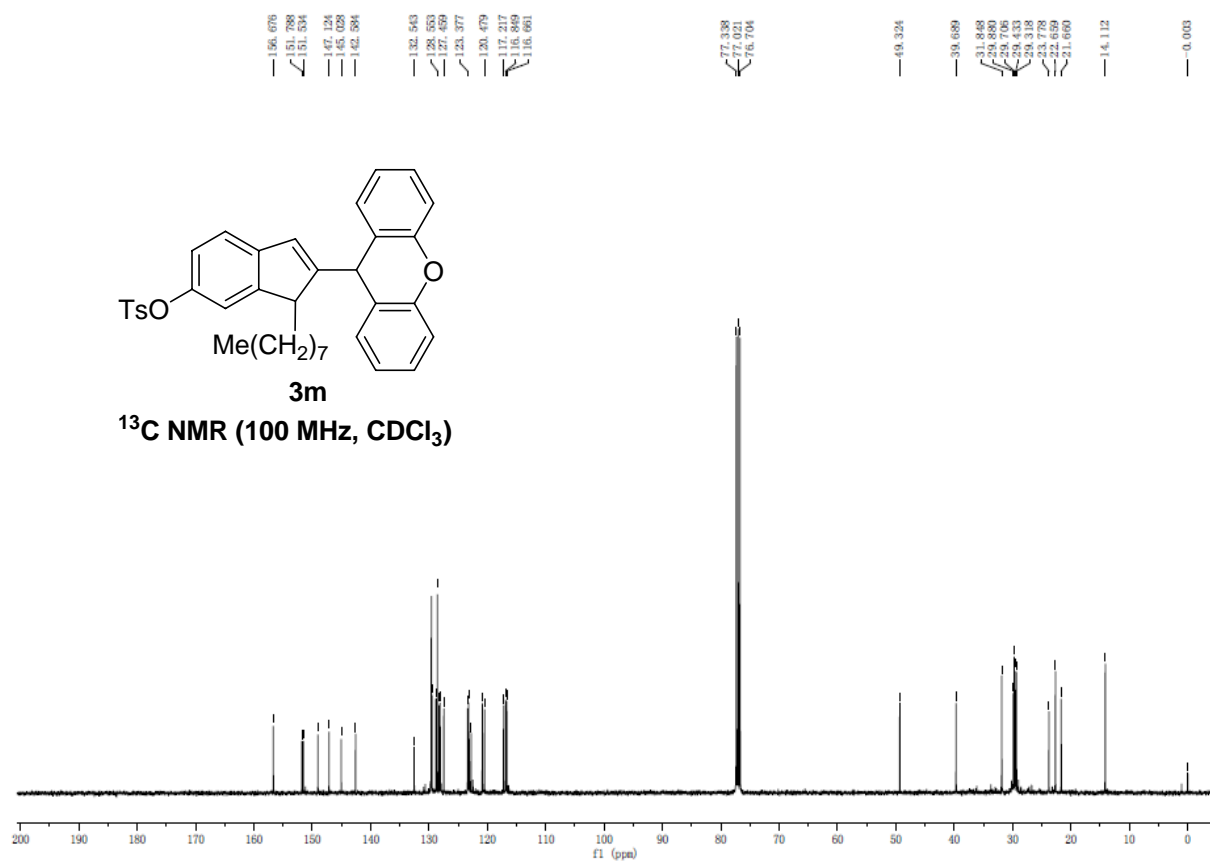



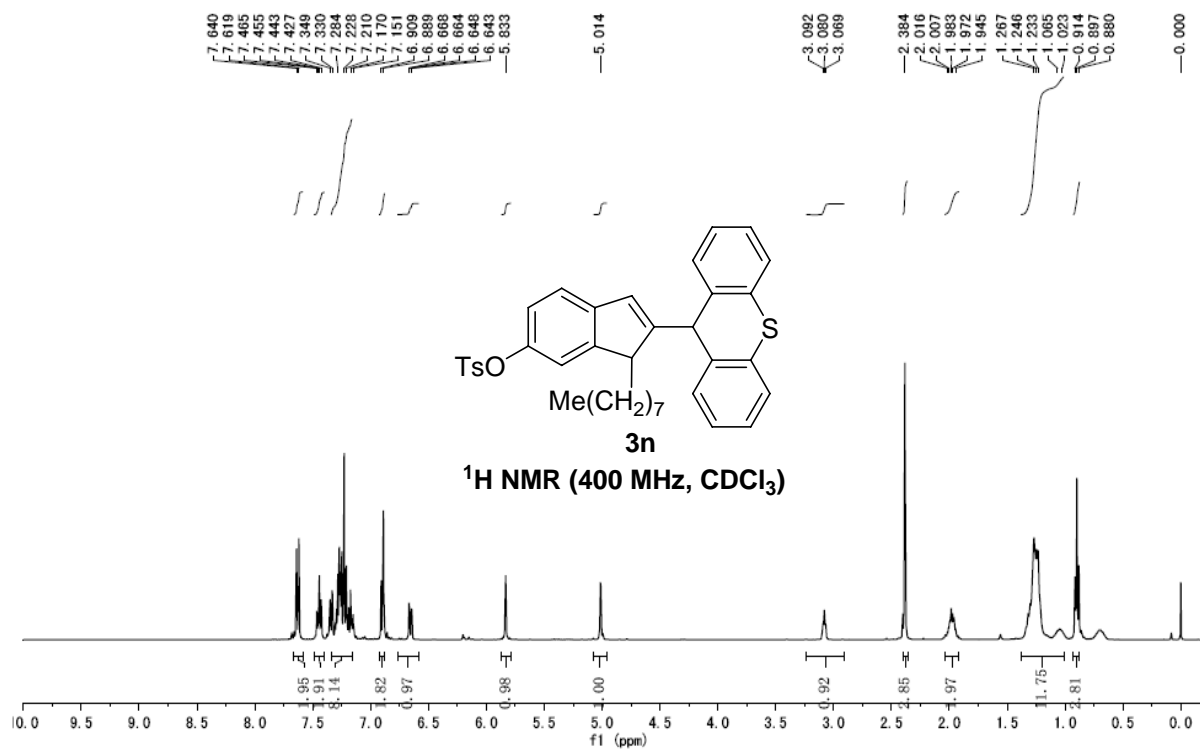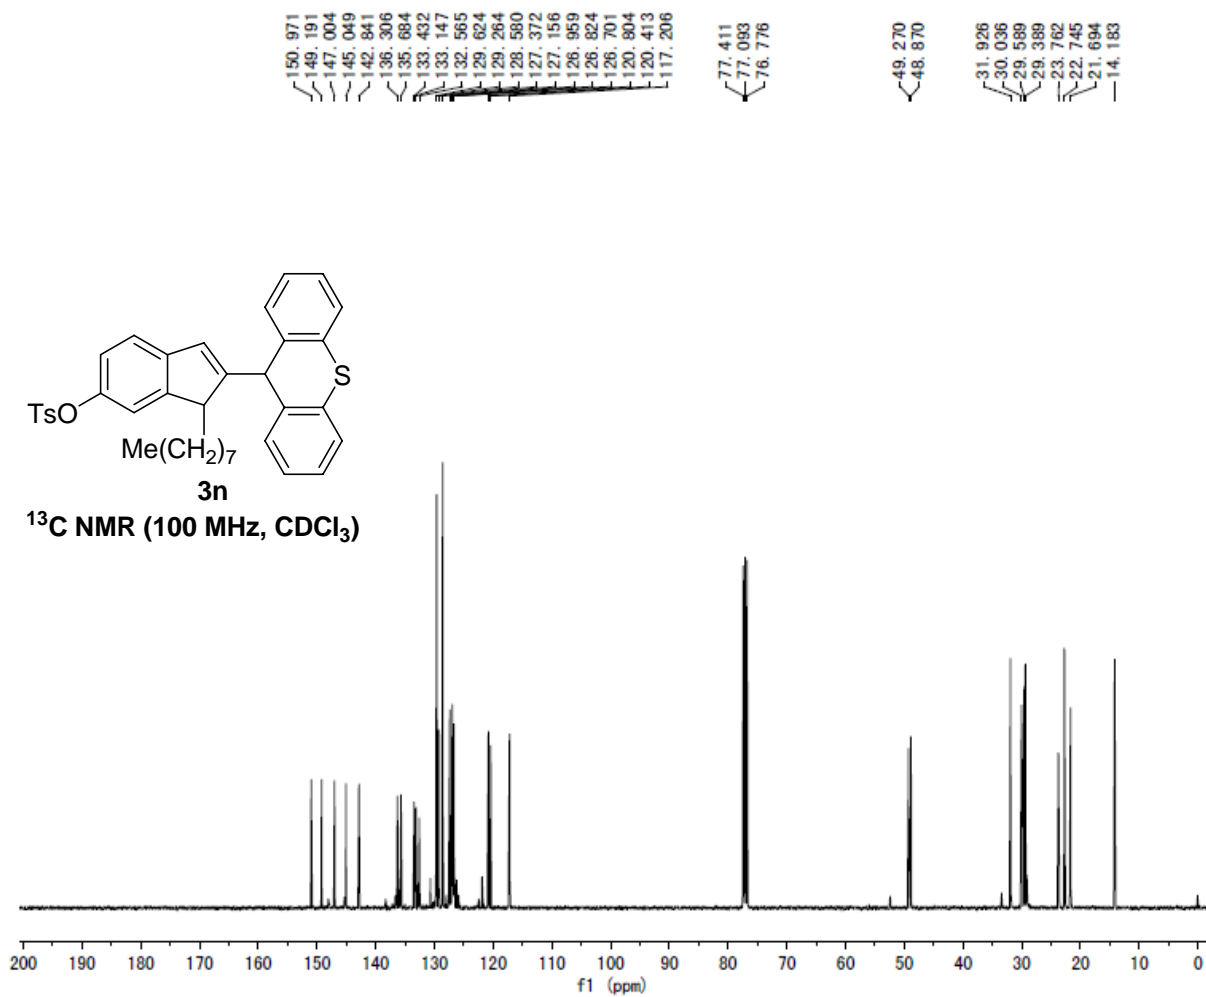

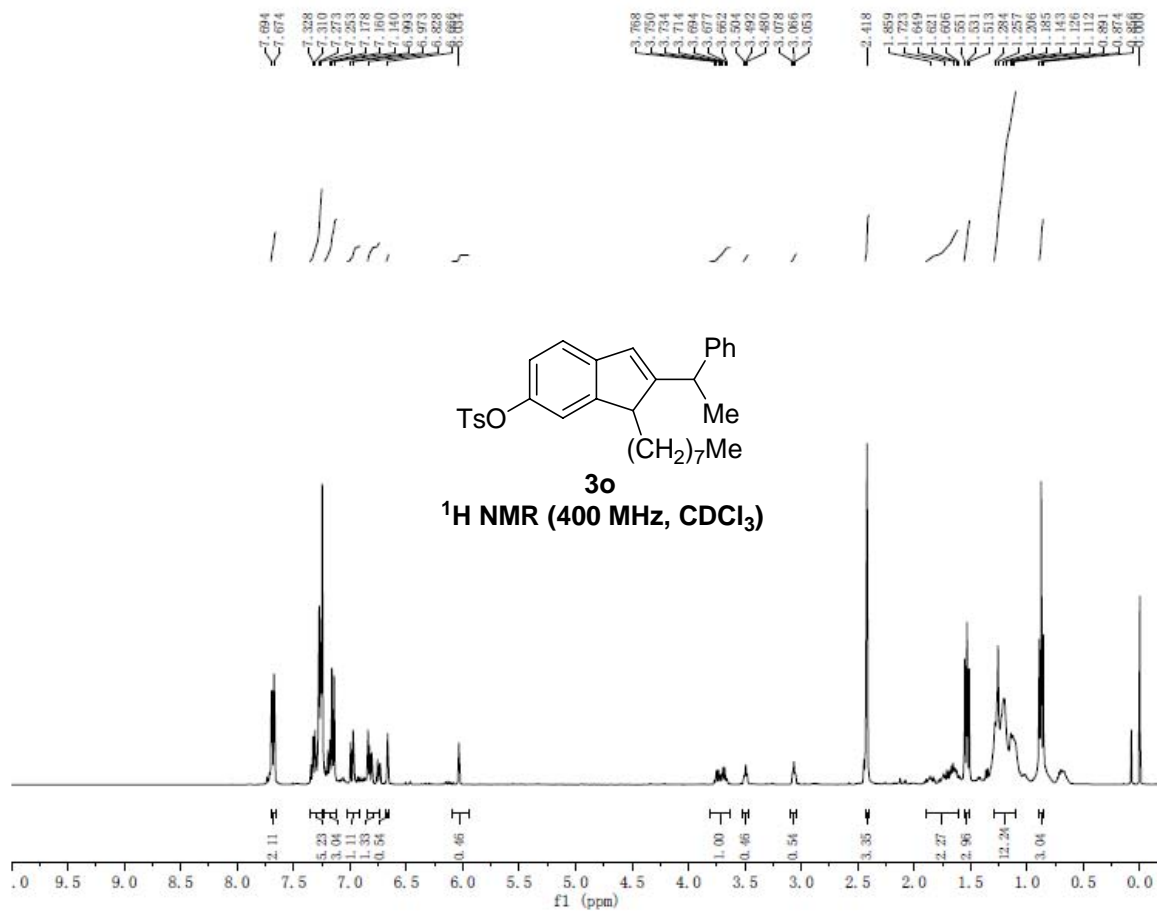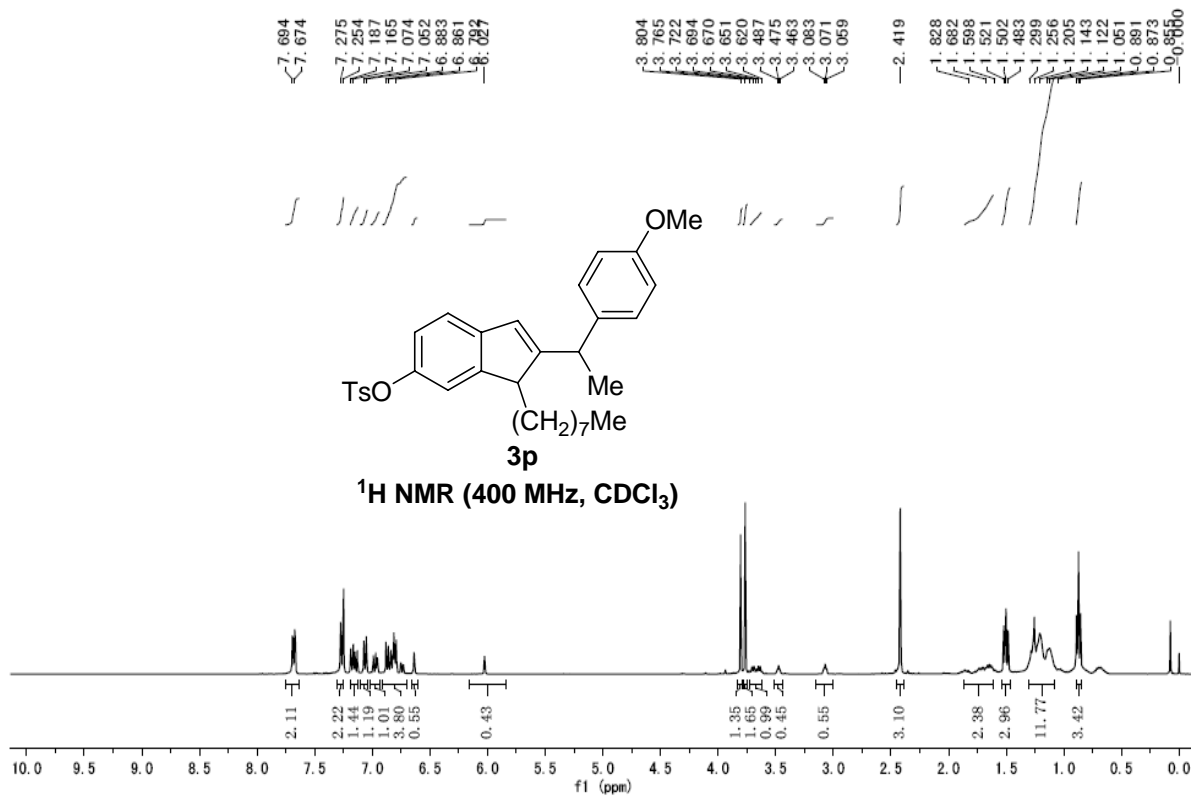

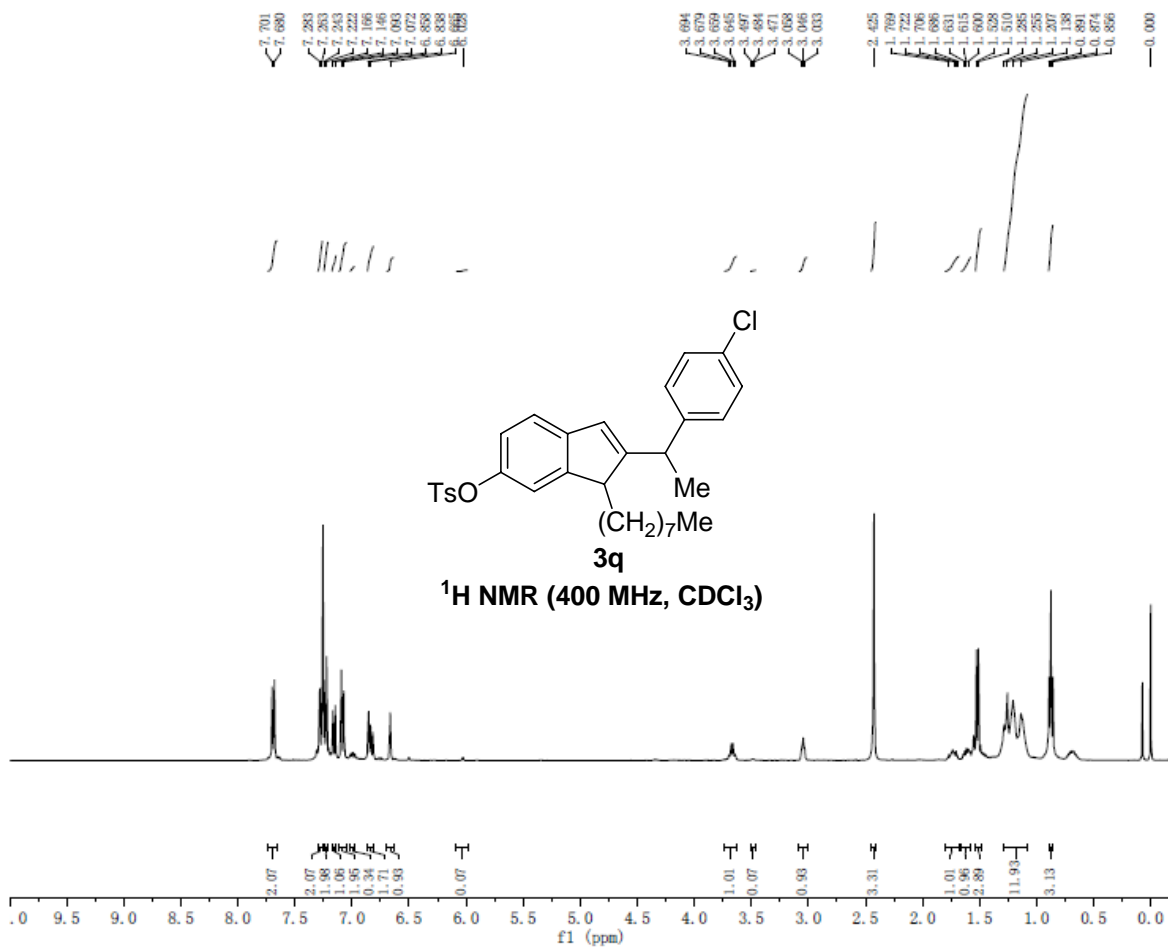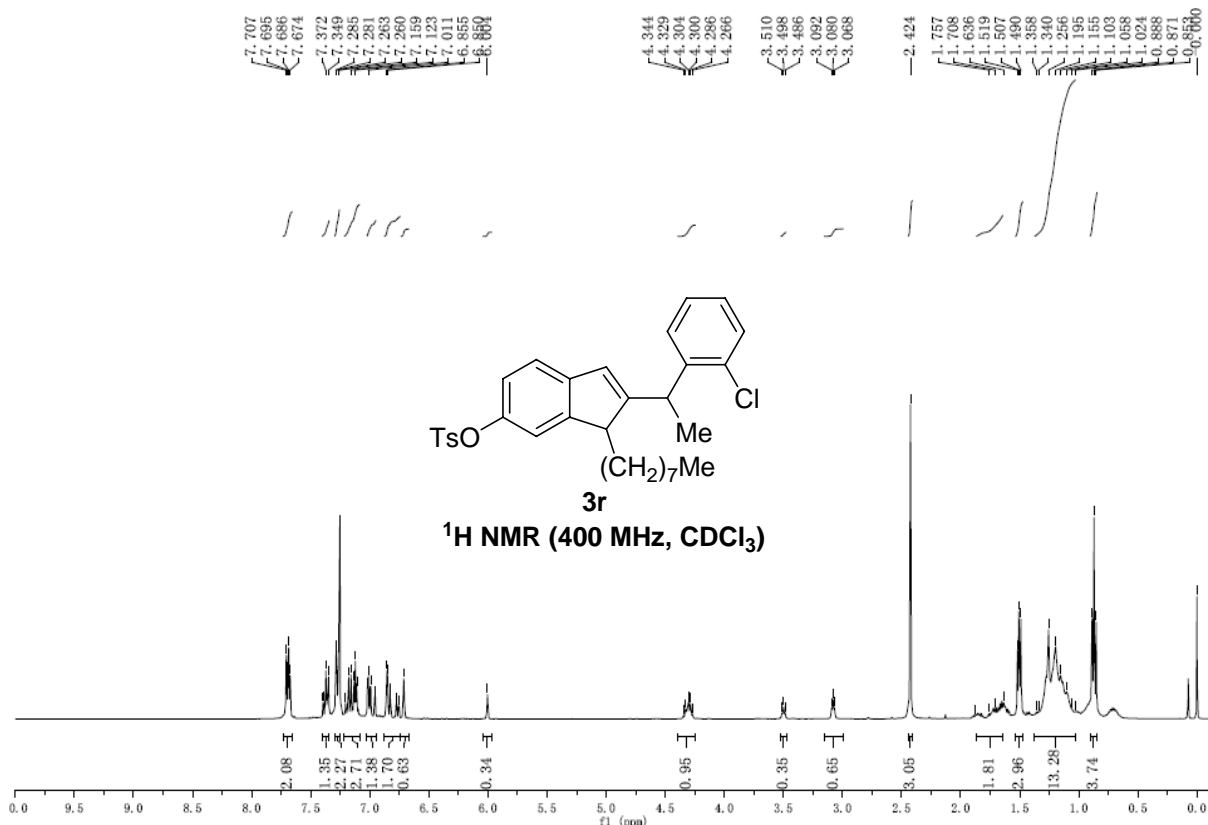

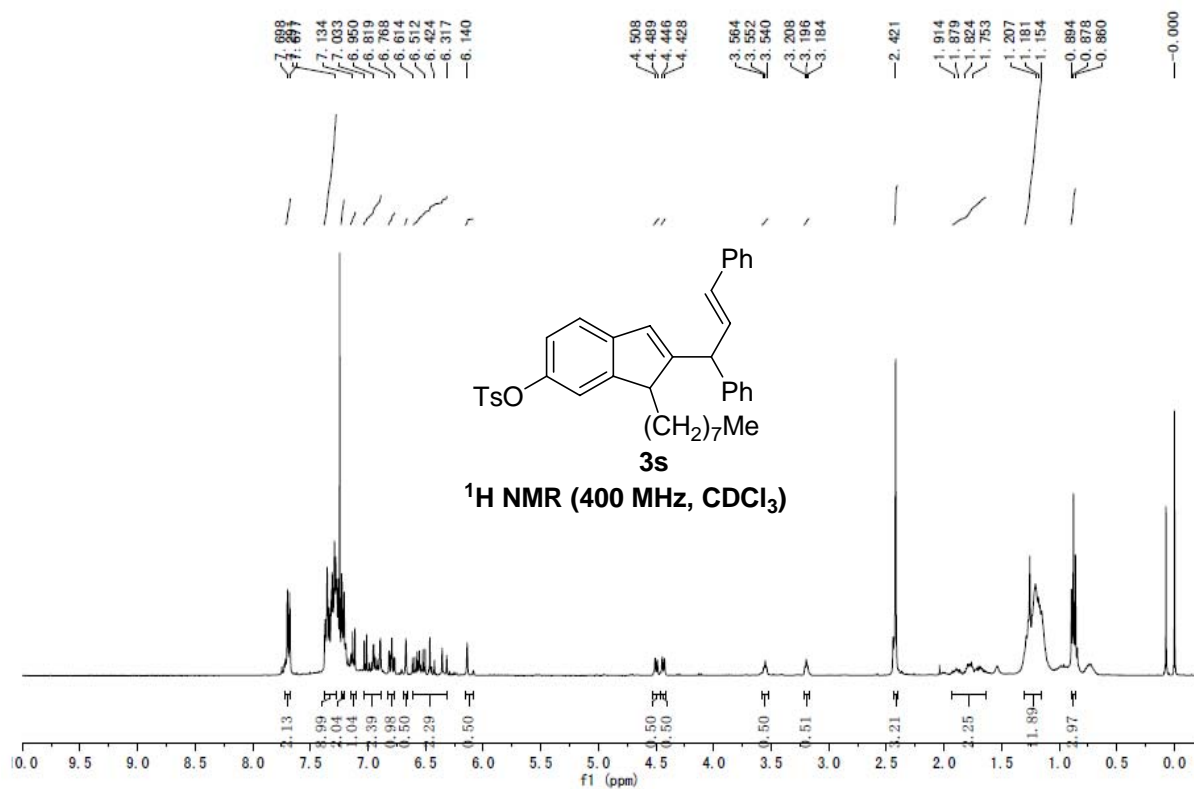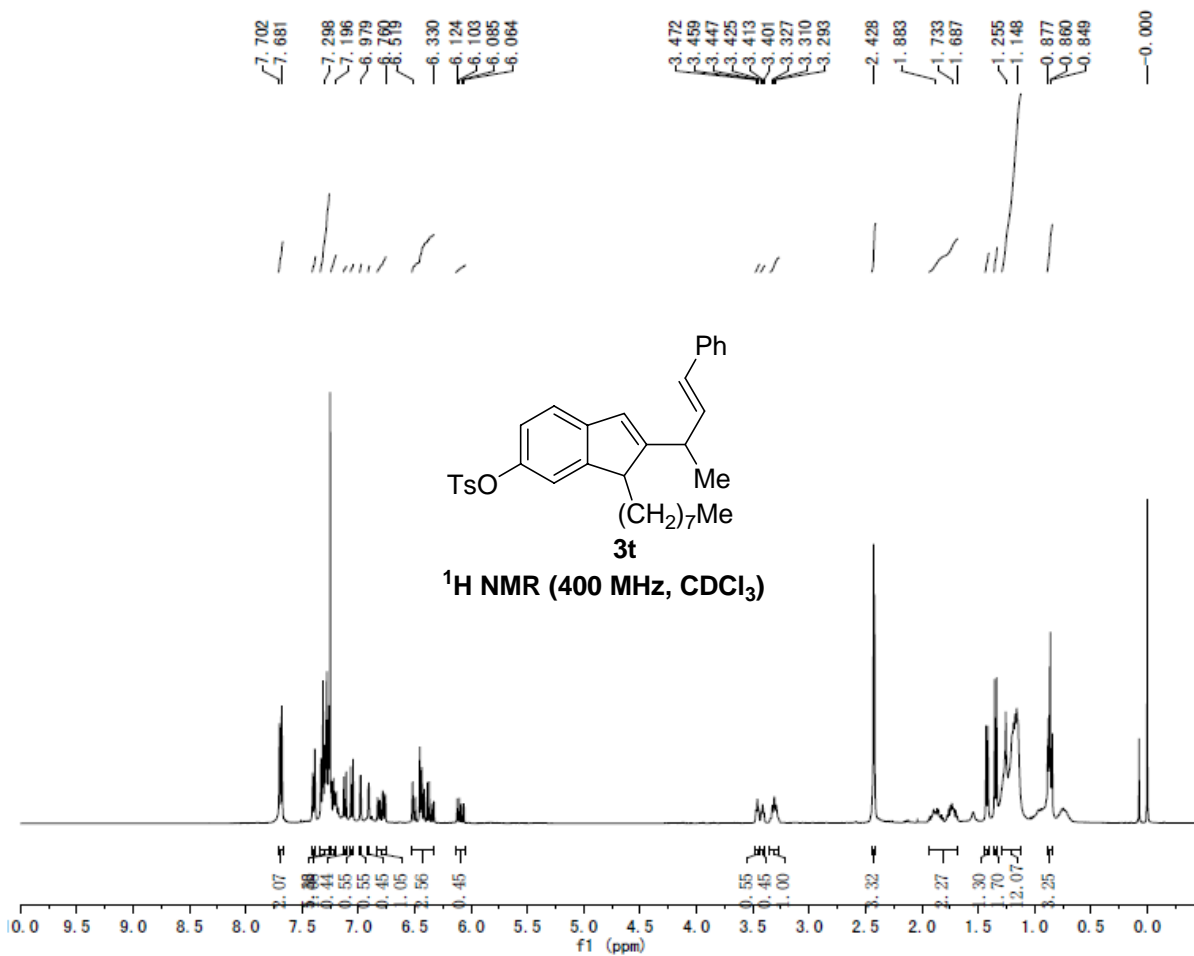

The crystal of compound **3c** was obtained by leaving alone its solution in toluene at room temperature in the open air for several days. The crystal data of compound **3c** have been deposited in CCDC with number 889428.

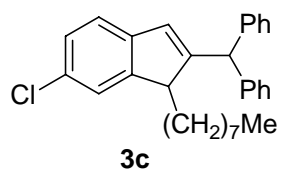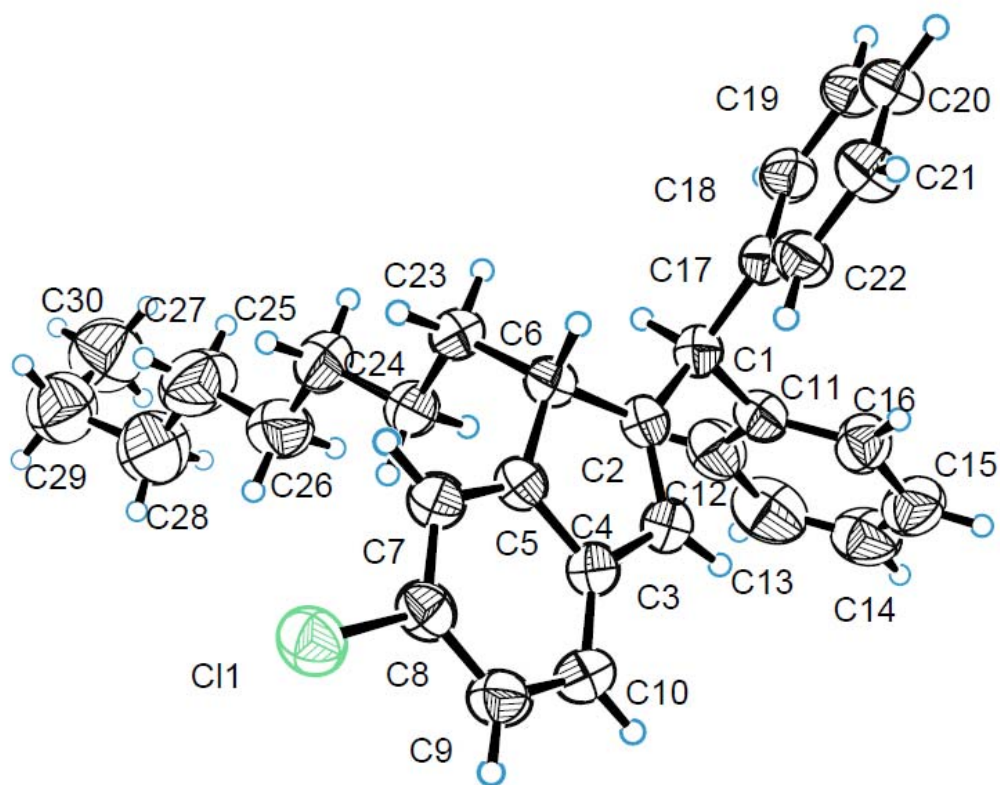

**Table 1 Crystal data and structure refinement for 110321**

|                                    |                                    |
|------------------------------------|------------------------------------|
| Identification code                | 110321                             |
| Empirical formula                  | C <sub>33</sub> H <sub>40</sub> Cl |
| Formula weight                     | 429.01                             |
| Temperature                        | 291(2)                             |
| Crystal system                     | Triclinic                          |
| Space group                        | P-1                                |
|                                    | 8.1616                             |
|                                    | (4),                               |
| a/Å, b/Å, c/Å                      | 9.0676                             |
|                                    | (4),                               |
|                                    | 17.2790                            |
|                                    | (8)                                |
|                                    | 88.400                             |
|                                    | (4),                               |
| α/°, β/°, γ/°                      | 88.014                             |
|                                    | (4),                               |
|                                    | 77.311                             |
|                                    | (4)                                |
| Volume/Å <sup>3</sup>              | 1246.50                            |
| Z                                  | (10)                               |
| Z                                  | 2                                  |
| ρ <sub>calc</sub> /mm <sup>3</sup> | 1.143                              |
| m/mm <sup>-1</sup>                 | 1.437                              |
| F(000)                             | 460                                |
|                                    | 0.40 ×                             |
| Crystal size                       | 0.30 ×                             |
|                                    | 0.30                               |
| Theta range for data collection    | 5.00 to                            |
|                                    | 69.58°                             |
|                                    | -9 ≤ h                             |
|                                    | ≤ 9, -                             |
| Index ranges                       | 11 ≤ k                             |
|                                    | ≤ 8, -                             |
|                                    | 20 ≤ l                             |
|                                    | ≤ 18                               |
| Reflections collected              | 10255                              |
|                                    | 4574[R                             |
| Independent reflections            | (int) =                            |
|                                    | 0.0216]                            |
| Data/restraints/parameters         | 4574/51/287                        |
| Goodness-of-fit on F <sup>2</sup>  | 1.053                              |
|                                    | R <sub>1</sub> =                   |
| Final R indexes [I > 2σ (I)]       | 0.0665,                            |
|                                    | wR <sub>2</sub> =                  |
|                                    | 0.1331                             |
|                                    | R <sub>1</sub> =                   |
| Final R indexes [all data]         | 0.0795,                            |
|                                    | wR <sub>2</sub> =                  |
|                                    | 0.1403                             |
| Largest diff. peak/hole            | 0.341/-                            |
|                                    | 0.491                              |

**Table 2 Atomic Coordinates (Å × 10<sup>4</sup>) and Equivalent Isotropic Displacement Parameters (Å<sup>2</sup> × 10<sup>3</sup>) for 110321. U<sub>eq</sub> is defined as 1/3 of of the trace of the orthogonalised U<sub>ij</sub> tensor.**

| Atom | x           | y          | z       | U(eq)    |
|------|-------------|------------|---------|----------|
| Cl1  | 7440.2 (11) | 7087.1 (9) | 373 (5) | 81.5 (3) |

|      |           |           |             |            |
|------|-----------|-----------|-------------|------------|
| C6   | 4230 (3)  | 3052 (3)  | 1641.5 (17) | 60.9 (7)   |
| C2   | 5079 (3)  | 1532 (3)  | 1992.2 (16) | 59.7 (7)   |
| C23  | 2973 (4)  | 4075 (3)  | 2180.4 (19) | 68.5 (8)   |
| C1   | 4086 (4)  | 451 (3)   | 2348.7 (17) | 61.4 (7)   |
| C5   | 5712 (3)  | 3700 (3)  | 1373.3 (16) | 58.1 (6)   |
| C3   | 6750 (4)  | 1347 (3)  | 1930.6 (18) | 65.1 (7)   |
| C10  | 8753 (4)  | 2986 (4)  | 1356.2 (19) | 73.2 (8)   |
| C4   | 7205 (3)  | 2661 (3)  | 1549.9 (17) | 61.1 (7)   |
| C17  | 3122 (3)  | -228 (3)  | 1757.4 (17) | 59 (7)     |
| C24  | 3687 (4)  | 4409 (4)  | 2935 (2)    | 79.1 (9)   |
| C11  | 5191 (4)  | -754 (3)  | 2845.7 (18) | 66 (7)     |
| C7   | 5768 (4)  | 5063 (3)  | 1007.8 (16) | 62.2 (7)   |
| C9   | 8809 (4)  | 4359 (4)  | 995.2 (19)  | 71 (8)     |
| C18  | 1793 (4)  | -867 (3)  | 2016 (2)    | 72.5 (8)   |
| C22  | 3531 (4)  | -272 (3)  | 984.6 (18)  | 70.5 (8)   |
| C8   | 7327 (4)  | 5369 (3)  | 826 (17)    | 64.3 (7)   |
| C20  | 1356 (4)  | -1551 (4) | 726 (2)     | 84.1 (10)  |
| C16  | 6126 (4)  | -2070 (4) | 2533 (2)    | 78.7 (9)   |
| C19  | 925 (4)   | -1525 (4) | 1496 (2)    | 82.6 (10)  |
| C15  | 7206 (5)  | -3119 (4) | 2980 (3)    | 95.7 (11)  |
| C21  | 2656 (4)  | -930 (4)  | 467 (2)     | 81.9 (9)   |
| C25  | 2426 (5)  | 5455 (4)  | 3441 (2)    | 98.5 (11)  |
|      | 5350 (5)  | -530 (4)  | 3620 (2)    | 90.4 (10)  |
| C12  |           |           |             |            |
| C14  | 7355 (6)  | -2879 (5) | 3739 (3)    | 108.6 (14) |
| C26  | 3056 (5)  | 5851 (5)  | 4187 (3)    | 118.3 (14) |
| C13  | 6434 (6)  | -1592 (6) | 4069 (2)    | 112.2 (14) |
| C27  | 1789 (6)  | 6859 (7)  | 4709 (3)    | 147 (2)    |
| C28' | 2419 (7)  | 7309 (6)  | 5424 (3)    | 148.2 (15) |
| C29' | 1409 (14) | 7640 (16) | 6201 (6)    | 141.8 (18) |
| C30' | -223 (16) | 8499 (15) | 5920 (9)    | 162 (2)    |
| C28  | 2419 (7)  | 7309 (6)  | 5424 (3)    | 148.2 (15) |
| C29  | 1219 (13) | 8591 (10) | 5882 (6)    | 141.8 (18) |
| C30  | 288 (16)  | 7713 (14) | 6386 (7)    | 162 (2)    |

**Table 3 Anisotropic Displacement Parameters ( $\text{\AA}^2 \times 10^3$ ) for 110321. The Anisotropic displacement factor exponent takes the form:  $-2\pi^2[h^2a^{*2}U_{11}+\dots+2hka^*b^*U_{12}]$**

| Atom | $U_{11}$  | $U_{22}$  | $U_{33}$   | $U_{23}$   | $U_{13}$  | $U_{12}$   |
|------|-----------|-----------|------------|------------|-----------|------------|
| C11  | 84.9 (6)  | 78.1 (5)  | 85.2 (6)   | 7.1 (4)    | 0.2 (4)   | -27.3 (4)  |
| C6   | 56.6 (15) | 59.1 (16) | 68.3 (18)  | -6.3 (13)  | -9.5 (13) | -13.7 (12) |
| C2   | 63.2 (17) | 53.1 (15) | 63.5 (17)  | -9.8 (12)  | -3.9 (13) | -13 (12)   |
| C23  | 53.6 (16) | 62.1 (17) | 88 (2)     | -4.1 (15)  | -1.3 (14) | -7.9 (13)  |
| C1   | 61.2 (16) | 56.9 (16) | 65.7 (17)  | -8.4 (13)  | 2.2 (13)  | -12 (13)   |
| C5   | 56 (15)   | 58.4 (16) | 61.1 (16)  | -9.7 (13)  | -5.5 (12) | -13.5 (12) |
| C3   | 57.7 (16) | 56 (16)   | 79 (2)     | -5.3 (14)  | -3.6 (14) | -6.7 (12)  |
| C10  | 53 (16)   | 73 (2)    | 91 (2)     | -2 (17)    | -3.7 (15) | -7.8 (14)  |
| C4   | 55.7 (16) | 59.4 (16) | 67.6 (18)  | -9.6 (13)  | -3.6 (13) | -9.8 (12)  |
| C17  | 52.6 (15) | 51.1 (15) | 72.9 (18)  | -3.9 (13)  | -2.1 (13) | -9.6 (12)  |
| C24  | 68.7 (19) | 79 (2)    | 89 (2)     | -22.8 (18) | 7.8 (17)  | -12.9 (16) |
| C11  | 68.4 (18) | 67.6 (18) | 66.4 (18)  | -0.6 (14)  | -5.1 (14) | -24.3 (14) |
| C7   | 58.9 (16) | 62.2 (17) | 65.6 (17)  | -4.7 (13)  | -7.8 (13) | -11.9 (13) |
| C9   | 56.8 (17) | 78 (2)    | 81 (2)     | -5.4 (16)  | 2 (15)    | -20.2 (15) |
| C18  | 64.3 (18) | 69.8 (19) | 84 (2)     | -3 (16)    | 4.3 (15)  | -16 (15)   |
| C22  | 67.3 (18) | 74 (19)   | 76 (2)     | -8.2 (16)  | 0.3 (15)  | -27.7 (15) |
| C8   | 67.2 (18) | 67.7 (18) | 60.9 (17)  | -8.3 (14)  | -1.9 (14) | -20.2 (14) |
| C20  | 74 (2)    | 81 (2)    | 103 (3)    | -11 (2)    | -20 (2)   | -25.4 (17) |
| C16  | 83 (2)    | 70 (2)    | 80 (2)     | -0.1 (17)  | -9.8 (17) | -10.2 (16) |
| C19  | 58.8 (18) | 76 (2)    | 118 (3)    | -6 (2)     | -2.5 (19) | -25.4 (16) |
| C15  | 86 (3)    | 81 (2)    | 117 (3)    | 15 (2)     | -15 (2)   | -10.3 (19) |
| C21  | 85 (2)    | 87 (2)    | 80 (2)     | -12.9 (18) | -7.4 (18) | -30 (19)   |
| C25  | 83 (2)    | 87 (2)    | 121 (3)    | -12 (2)    | 6 (2)     | -6.6 (19)  |
| C12  | 106 (3)   | 94 (3)    | 75 (2)     | -4.8 (19)  | -11 (2)   | -29 (2)    |
| C14  | 99 (3)    | 108 (3)   | 124 (4)    | 36 (3)     | -38 (3)   | -32 (3)    |
| C26  | 87 (3)    | 132 (4)   | 138 (3)    | -32 (3)    | 7 (2)     | -27 (2)    |
| C13  | 136 (4)   | 134 (4)   | 77 (3)     | 16 (3)     | -36 (3)   | -48 (3)    |
| C27  | 105 (3)   | 178 (5)   | 146 (4)    | -48 (3)    | 2 (3)     | -2 (3)     |
| C28' | 151 (2)   | 151 (2)   | 141.3 (18) | -21.4 (14) | -5.2 (13) | -28.5 (13) |
| C29' | 145 (2)   | 141 (2)   | 139 (2)    | -10.9 (13) | -3.5 (14) | -27.9 (14) |
| C30' | 159 (2)   | 164 (3)   | 161 (3)    | 0.8 (14)   | 3.4 (14)  | -34.7 (15) |
| C28  | 151 (2)   | 151 (2)   | 141.3 (18) | -21.4 (14) | -5.2 (13) | -28.5 (13) |
| C29  | 145 (2)   | 141 (2)   | 139 (2)    | -10.9 (13) | -3.5 (14) | -27.9 (14) |
| C30  | 159 (2)   | 164 (3)   | 161 (3)    | 0.8 (14)   | 3.4 (14)  | -34.7 (15) |

**Table 4 Bond Lengths for 110321.**

| Atom | Atom | Length/ $\text{\AA}$ | Atom | Atom | Length/ $\text{\AA}$ |
|------|------|----------------------|------|------|----------------------|
| C11  | C8   | 1.743 (3)            | C11  | C16  | 1.380 (4)            |
| C6   | C5   | 1.511 (4)            | C7   | C8   | 1.385 (4)            |
| C6   | C2   | 1.520 (4)            | C9   | C8   | 1.382 (4)            |
| C6   | C23  | 1.531 (4)            | C18  | C19  | 1.388 (4)            |
| C2   | C3   | 1.338 (4)            | C22  | C21  | 1.388 (4)            |
| C2   | C1   | 1.509 (4)            | C20  | C21  | 1.363 (5)            |
| C23  | C24  | 1.511 (4)            | C20  | C19  | 1.365 (5)            |
| C1   | C11  | 1.521 (4)            | C16  | C15  | 1.384 (5)            |
| C1   | C17  | 1.532 (4)            | C15  | C14  | 1.349 (6)            |
| C5   | C7   | 1.381 (4)            | C25  | C26  | 1.486 (6)            |
| C5   | C4   | 1.404 (4)            | C12  | C13  | 1.394 (5)            |
| C3   | C4   | 1.458 (4)            | C14  | C13  | 1.369 (6)            |
| C10  | C9   | 1.386 (4)            | C26  | C27  | 1.512 (6)            |
| C10  | C4   | 1.387 (4)            | C27  | C28' | 1.456 (7)            |
| C17  | C22  | 1.365 (4)            | C28' | C29' | 1.551 (8)            |
| C17  | C18  | 1.392 (4)            | C29' | C30' | 1.478 (8)            |
| C24  | C25  | 1.509 (4)            | C29  | C30  | 1.467 (8)            |
| C11  | C12  | 1.374 (4)            |      |      |                      |

**Table 5 Bond Angles for 110321.**

| Atom | Atom | Atom | Angle/ $^\circ$ | Atom | Atom | Atom | Angle/ $^\circ$ |
|------|------|------|-----------------|------|------|------|-----------------|
| C5   | C6   | C2   | 102.3 (2)       | C12  | C11  | C1   | 120.6 (3)       |
| C5   | C6   | C23  | 114.4 (2)       | C16  | C11  | C1   | 121.7 (3)       |
| C2   | C6   | C23  | 115.3 (2)       | C5   | C7   | C8   | 118.2 (3)       |
| C3   | C2   | C1   | 127.8 (3)       | C8   | C9   | C10  | 119.6 (3)       |
| C3   | C2   | C6   | 110.2 (2)       | C19  | C18  | C17  | 120.3 (3)       |
| C1   | C2   | C6   | 122.0 (2)       | C17  | C22  | C21  | 121.4 (3)       |



|     |     |     |           |      |      |      |     |
|-----|-----|-----|-----------|------|------|------|-----|
| C24 | C23 | C6  | 114.6 (2) | C9   | C8   | C7   | 122 |
| C2  | C1  | C11 | 111.0 (2) | C9   | C8   | C11  | 116 |
| C2  | C1  | C17 | 113.5 (2) | C7   | C8   | C11  | 119 |
| C11 | C1  | C17 | 112.3 (2) | C21  | C20  | C19  | 119 |
| C7  | C5  | C4  | 120.4 (3) | C11  | C16  | C15  | 121 |
| C7  | C5  | C6  | 130.5 (3) | C20  | C19  | C18  | 120 |
| C4  | C5  | C6  | 109.2 (2) | C14  | C15  | C16  | 120 |
| C2  | C3  | C4  | 110.6 (3) | C20  | C21  | C22  | 120 |
| C9  | C10 | C4  | 119.2 (3) | C26  | C25  | C24  | 115 |
| C10 | C4  | C5  | 120.5 (3) | C11  | C12  | C13  | 120 |
| C10 | C4  | C3  | 131.7 (3) | C15  | C14  | C13  | 119 |
| C5  | C4  | C3  | 107.8 (2) | C25  | C26  | C27  | 116 |
| C22 | C17 | C18 | 118.1 (3) | C14  | C13  | C12  | 120 |
| C22 | C17 | C1  | 122.9 (3) | C28' | C27  | C26  | 116 |
| C18 | C17 | C1  | 119.0 (3) | C27  | C28' | C29' | 126 |
| C25 | C24 | C23 | 113.0 (3) | C30' | C29' | C28' | 100 |
| C12 | C11 | C16 | 117.7 (3) |      |      |      |     |

Table 6 Torsion Angles for 110321.

| A   | B    | C    | D    | Angle/°    |
|-----|------|------|------|------------|
| C5  | C6   | C2   | C3   | -0.3 (3)   |
| C23 | C6   | C2   | C3   | -125.0 (3) |
| C5  | C6   | C2   | C1   | 179.7 (2)  |
| C23 | C6   | C2   | C1   | 55.0 (3)   |
| C5  | C6   | C23  | C24  | -62.0 (3)  |
| C2  | C6   | C23  | C24  | 56.2 (3)   |
| C3  | C2   | C1   | C11  | 15.7 (4)   |
| C6  | C2   | C1   | C11  | -164.2 (2) |
| C3  | C2   | C1   | C17  | -111.9 (3) |
| C6  | C2   | C1   | C17  | 68.1 (3)   |
| C2  | C6   | C5   | C7   | -179.9 (3) |
| C23 | C6   | C5   | C7   | -54.6 (4)  |
| C2  | C6   | C5   | C4   | 0.3 (3)    |
| C23 | C6   | C5   | C4   | 125.6 (3)  |
| C1  | C2   | C3   | C4   | -179.8 (3) |
| C6  | C2   | C3   | C4   | 0.1 (3)    |
| C9  | C10  | C4   | C5   | 0.9 (5)    |
| C9  | C10  | C4   | C3   | -179.4 (3) |
| C7  | C5   | C4   | C10  | -0.3 (4)   |
| C6  | C5   | C4   | C10  | 179.5 (3)  |
| C7  | C5   | C4   | C3   | 179.9 (3)  |
| C6  | C5   | C4   | C3   | -0.3 (3)   |
| C2  | C3   | C4   | C10  | -179.6 (3) |
| C2  | C3   | C4   | C5   | 0.1 (3)    |
| C2  | C1   | C17  | C22  | 20.6 (4)   |
| C11 | C1   | C17  | C22  | -106.3 (3) |
| C2  | C1   | C17  | C18  | -161.1 (3) |
| C11 | C1   | C17  | C18  | 72.0 (3)   |
| C6  | C23  | C24  | C25  | 178.4 (3)  |
| C2  | C1   | C11  | C12  | 90.4 (3)   |
| C17 | C1   | C11  | C12  | -141.4 (3) |
| C2  | C1   | C11  | C16  | -86.5 (3)  |
| C17 | C1   | C11  | C16  | 41.7 (4)   |
| C4  | C5   | C7   | C8   | -0.3 (4)   |
| C6  | C5   | C7   | C8   | 180.0 (3)  |
| C4  | C10  | C9   | C8   | -0.8 (5)   |
| C22 | C17  | C18  | C19  | 0.0 (4)    |
| C1  | C17  | C18  | C19  | -178.4 (3) |
| C18 | C17  | C22  | C21  | 0.1 (5)    |
| C1  | C17  | C22  | C21  | 178.4 (3)  |
| C10 | C9   | C8   | C7   | 0.3 (5)    |
| C10 | C9   | C8   | C11  | 179.9 (2)  |
| C5  | C7   | C8   | C9   | 0.3 (4)    |
| C5  | C7   | C8   | C11  | -179.4 (2) |
| C12 | C11  | C16  | C15  | -0.9 (5)   |
| C1  | C11  | C16  | C15  | 176.1 (3)  |
| C21 | C20  | C19  | C18  | 0.3 (5)    |
| C17 | C18  | C19  | C20  | -0.2 (5)   |
| C11 | C16  | C15  | C14  | 0.6 (6)    |
| C19 | C20  | C21  | C22  | -0.2 (5)   |
| C17 | C22  | C21  | C20  | 0.0 (5)    |
| C23 | C24  | C25  | C26  | -179.0 (3) |
| C16 | C11  | C12  | C13  | 0.7 (5)    |
| C1  | C11  | C12  | C13  | -176.3 (3) |
| C16 | C15  | C14  | C13  | 0.0 (6)    |
| C24 | C25  | C26  | C27  | -178.2 (4) |
| C15 | C14  | C13  | C12  | -0.2 (7)   |
| C11 | C12  | C13  | C14  | -0.1 (6)   |
| C25 | C26  | C27  | C28' | -177.1 (5) |
| C26 | C27  | C28' | C29' | -149.1 (8) |
| C27 | C28' | C29' | C30' | -41.5 (14) |

**Table 7 Hydrogen Atom Coordinates ( $\text{\AA} \times 10^4$ ) and Isotropic Displacement Parameters ( $\text{\AA}^2 \times 10^3$ ) for 110321.**

| Atom | x     | y     | z    | U(eq) |
|------|-------|-------|------|-------|
| H6   | 3635  | 2867  | 1183 | 73    |
| H23B | 2540  | 5024  | 1909 | 82    |
| H23A | 2035  | 3600  | 2296 | 82    |
| H1   | 3240  | 1045  | 2700 | 74    |
| H3   | 7515  | 497   | 2106 | 78    |
| H10  | 9741  | 2291  | 1467 | 88    |
| H24A | 4088  | 3466  | 3217 | 95    |
| H24B | 4643  | 4863  | 2823 | 95    |
| H7   | 4785  | 5756  | 887  | 75    |
| H9   | 9837  | 4599  | 868  | 85    |
| H18  | 1487  | -853  | 2540 | 87    |
| H22  | 4416  | 148   | 801  | 85    |
| H20  | 766   | -1989 | 379  | 101   |
| H16  | 6029  | -2255 | 2012 | 94    |
| H19  | 41    | -1952 | 1674 | 99    |
| H15  | 7832  | -3993 | 2756 | 115   |
| H21  | 2958  | -947  | -57  | 98    |
| H25B | 2011  | 6383  | 3149 | 118   |
| H25A | 1481  | 4988  | 3552 | 118   |
| H12  | 4726  | 341   | 3848 | 109   |
| H14  | 8082  | -3587 | 4037 | 130   |
| H26B | 3979  | 6346  | 4074 | 142   |
| H26A | 3506  | 4920  | 4471 | 142   |
| H13  | 6532  | -1427 | 4592 | 135   |
| H27B | 1297  | 7767  | 4417 | 176   |
| H27A | 894   | 6340  | 4844 | 176   |
| H28A | 2828  | 8214  | 5292 | 178   |
| H28B | 3401  | 6528  | 5543 | 178   |
| H29A | 1298  | 6715  | 6472 | 170   |
| H29B | 1920  | 8242  | 6536 | 170   |
| H30A | -1001 | 8741  | 6351 | 242   |
| H30B | -656  | 7898  | 5563 | 242   |
| H30C | -73   | 9415  | 5664 | 242   |
| H28C | 3455  | 7634  | 5300 | 178   |
| H28D | 2695  | 6425  | 5763 | 178   |
| H29C | 1842  | 9162  | 6180 | 170   |
| H29D | 478   | 9275  | 5539 | 170   |
| H30D | -531  | 8389  | 6695 | 242   |
| H30E | 1055  | 7051  | 6718 | 242   |
| H30F | -269  | 7124  | 6074 | 242   |
